# Supplementary material for: How Is Mobile User Behavior Different? A Hidden Markov Model of Cross-Mobile Application Usage Dynamics
Source: Atypon-hosted journal article supplement (doi:10.1287/isre.2021.1093), 2022-01-20
Supplement: isre.2021.1093.sm1.pdf [file isre.2021.1093.sm1.pdf]

## Online Appendix

### A. Algorithm to Classify Location Types

Following Zheng et al. (2009), we use the algorithm below to classify locations into home, office, or on the way.

---

|                                             |                                                                                                       |
|---------------------------------------------|-------------------------------------------------------------------------------------------------------|
| <b>Algorithm: Predicting Location Types</b> |                                                                                                       |
| <b>Input:</b>                               | Users' location logs and thresholds: $\varphi = \{LName, LTime, N_{thresh}, D_{thresh}, S_{thresh}\}$ |
| <b>Output:</b>                              | Location type: $Ltype$                                                                                |
| 1.                                          | <b>For each</b> $u_k \in U$ <b>do</b>                                                                 |
| 2.                                          | Calculate all stay points for user $u_k$                                                              |
| 3.                                          | <b>For each</b> $l_i \in L_u$ <b>do</b>                                                               |
| 4.                                          | <b>if</b> $l_i$ is not a stay point:                                                                  |
| 5.                                          | <b>Return ON THE WAY</b>                                                                              |
| 6.                                          | <b>else:</b>                                                                                          |
| 7.                                          | $NumNights_k$ = number of days that customer $u_k$ uses mobile apps at night                          |
| 8.                                          | $NumDays_k$ = number of days that customer $u_k$ uses mobile apps during the day                      |
| 9.                                          | <b>if</b> $NumNights_k \geq N_{thresh}$ :                                                             |
| 10.                                         | <b>Return HOME;</b>                                                                                   |
| 11.                                         | <b>else if</b> $NumDays_k \geq D_{thresh}$ :                                                          |
| 12.                                         | <b>Return OFFICE;</b>                                                                                 |
| 13.                                         | <b>else:</b>                                                                                          |
| 14.                                         | <b>Return ON THE WAY</b>                                                                              |

---

$LName$  is the name of the location where individuals use mobile apps.  $LTime$  is the time when customers use mobile apps.  $N_{thresh}$ ,  $D_{thresh}$ , and  $S_{thresh}$  are three thresholds. In our research, we set  $N_{thresh}$ ,  $D_{thresh}$ , and  $S_{thresh}$  at 3, 3, and 60, respectively.  $U$  is the individual set.  $L_u$  is the location name set for user  $u$ . In the algorithm above, if the maximum duration time for a place where a user stays is not less than  $S_{thresh}$  (60 minutes), we assume that this place is a stay point. Otherwise, we classify this place into the category of on the way. For each location in the stay point set, we calculate how many nights that each user plays mobile apps in that place as  $NumNights_k$ . We also quantify the number of days that a user plays mobile apps during the day as  $NumDays_k$ . If the number of nights is larger than or equal to  $N_{thresh}$  (3 days), then we predict that this place belongs to the home category. If the number of nights is less than three days and  $NumDays_k$  is not less than  $D_{thresh}$ , we assume that this location belongs to the office category. Otherwise, we predict that this place is on the way.

## B. Main Model Parameter Estimates of State-dependent App Choice

**Table B1.** Parameter Estimates of App Choice (Social Apps)

| Parameter           | Utilitarian |          | Social     |          | Hedonic    |          |
|---------------------|-------------|----------|------------|----------|------------|----------|
| $\beta_{morning}$   | -0.2093     | (0.1307) | -0.1985    | (0.3343) | 0.2679     | (0.3332) |
| $\beta_{day}$       | -0.3197***  | (0.1122) | -0.3656    | (0.3036) | -0.0486    | (0.2881) |
| $\beta_{evening}$   | -0.4102***  | (0.1085) | -0.3608    | (0.2924) | -0.1174    | (0.2937) |
| $\beta_{home}$      | 0.4516***   | (0.0575) | -0.7258*** | (0.2063) | 0.2203     | (0.2171) |
| $\beta_{way}$       | -0.2655***  | (0.0794) | 0.0851     | (0.2449) | 0.0915     | (0.2481) |
| $\beta_{WiFi}$      | 0.0077      | (0.0542) | -0.1387    | (0.1729) | 0.0052     | (0.1697) |
| $\beta_{tsocial}$   | -0.0221     | (0.0194) | 0.0235     | (0.1306) | 0.0618     | (0.0962) |
| $\beta_{tinfo}$     | 0.1222**    | (0.0549) | 0.0406     | (0.0945) | 0.2894     | (0.1913) |
| $\beta_{tent}$      | 0.2128***   | (0.0701) | 0.1543***  | (0.0478) | 0.2678*    | (0.1525) |
| $\beta_{tshop}$     | 0.2673**    | (0.1127) | 0.1904     | (0.1871) | 0.0399     | (0.4488) |
| $\beta_{ttool}$     | 0.0828      | (0.0549) | 0.1390     | (0.1500) | 0.0053     | (0.1727) |
| $\beta_{nsocial}$   | -0.8234***  | (0.0381) | -2.2162*** | (0.2407) | -2.5399*** | (0.3030) |
| $\beta_{ninfo}$     | -0.2045**   | (0.0940) | 0.0439     | (0.3296) | -0.3724    | (0.4980) |
| $\beta_{nent}$      | 0.0916      | (0.0794) | 0.0753     | (0.1459) | -1.4057*** | (0.3032) |
| $\beta_{nshop}$     | 0.1213      | (0.0911) | -0.3271    | (0.3605) | -0.0848    | (0.7824) |
| $\beta_{ntool}$     | -0.2475***  | (0.0752) | 0.1139     | (0.1811) | -0.5736    | (0.3920) |
| $\beta_{week1}$     | -0.0959     | (0.0626) | 0.0175     | (0.2108) | -0.0549    | (0.2073) |
| $\beta_{week2}$     | -0.0196     | (0.0660) | 0.0245     | (0.2083) | 0.0917     | (0.2049) |
| $\beta_{mon}$       | -0.0530     | (0.0970) | -0.0445    | (0.3165) | 0.0118     | (0.3196) |
| $\beta_{tues}$      | -0.0486     | (0.0977) | 0.0148     | (0.3046) | -0.0001    | (0.3101) |
| $\beta_{wed}$       | 0.0747      | (0.0978) | -0.0812    | (0.2939) | -0.0286    | (0.3162) |
| $\beta_{thur}$      | 0.0106      | (0.0973) | -0.0283    | (0.3124) | 0.0051     | (0.3050) |
| $\beta_{fri}$       | 0.0966      | (0.0969) | -0.0377    | (0.2722) | -0.0292    | (0.3116) |
| $\beta_{sat}$       | 0.0333      | (0.0962) | -0.0861    | (0.2806) | -0.0297    | (0.3197) |
| $\beta_{Tinterval}$ | -3.9997***  | (0.1081) | -3.9997*** | (0.2545) | -3.9996*** | (0.4326) |

Significance levels: \*  $p < 0.1$ ; \*\*  $p < 0.05$ ; \*\*\*  $p < 0.01$ . Standard errors are in parentheses.

**Table B2.** Parameter Estimates of App Choice (Information Apps)

| Parameter           | Utilitarian |          | Social     |          | Hedonic    |          |
|---------------------|-------------|----------|------------|----------|------------|----------|
| $\beta_{morning}$   | -0.0462     | (0.1365) | -0.0344    | (0.1481) | -0.1244    | (0.2966) |
| $\beta_{day}$       | 0.0006      | (0.1114) | -0.0518    | (0.2604) | 0.0693     | (0.2578) |
| $\beta_{evening}$   | -0.1668     | (0.1160) | -0.0432    | (0.1980) | 0.0577     | (0.2472) |
| $\beta_{home}$      | -0.4533***  | (0.0319) | 0.0458     | (0.2715) | -0.0620    | (0.1829) |
| $\beta_{way}$       | -0.1268     | (0.0808) | -0.1816    | (0.2772) | -0.2117    | (0.2141) |
| $\beta_{WiFi}$      | -0.1854***  | (0.0562) | -0.4345*** | (0.1529) | -0.1579    | (0.1448) |
| $\beta_{tsocial}$   | 0.1265*     | (0.0679) | 0.0224     | (0.1188) | -0.1018    | (0.0620) |
| $\beta_{tinfo}$     | 0.0686*     | (0.0388) | 0.1212     | (0.1327) | -0.0943    | (0.1867) |
| $\beta_{tent}$      | 0.2642**    | (0.1067) | 0.1907     | (0.1447) | 0.0776     | (0.1448) |
| $\beta_{tshop}$     | 0.1817**    | (0.0864) | 0.0005     | (0.1922) | 0.4703     | (0.4123) |
| $\beta_{ttool}$     | 0.1506**    | (0.0689) | 0.1716     | (0.2289) | -0.0993    | (0.1631) |
| $\beta_{nsocial}$   | -0.2606**   | (0.1064) | 0.2915     | (0.2290) | 0.0196     | (0.2854) |
| $\beta_{ninfo}$     | -1.3336***  | (0.0775) | -3.5882*** | (0.3173) | -2.0811*** | (0.4862) |
| $\beta_{nent}$      | -0.0413     | (0.1311) | -0.0230    | (0.2011) | -0.3917    | (0.3446) |
| $\beta_{nshop}$     | -0.1388     | (0.1377) | 0.2302     | (0.5172) | -0.4462    | (0.5695) |
| $\beta_{ntool}$     | -0.3079***  | (0.1083) | -0.1549    | (0.2095) | -0.0725    | (0.3994) |
| $\beta_{week1}$     | -0.1486*    | (0.0824) | 0.0397     | (0.1475) | -0.0924    | (0.1752) |
| $\beta_{week2}$     | -0.0170     | (0.0866) | 0.0584     | (0.0736) | -0.0168    | (0.1592) |
| $\beta_{mon}$       | -0.0987     | (0.1273) | -0.0322    | (0.2568) | 0.0362     | (0.2844) |
| $\beta_{tues}$      | -0.1590     | (0.1252) | 0.0278     | (0.2941) | -0.0671    | (0.2476) |
| $\beta_{wed}$       | 0.0123      | (0.1180) | -0.0570    | (0.3207) | 0.0325     | (0.2673) |
| $\beta_{thur}$      | 0.0598      | (0.1215) | -0.0705    | (0.2664) | 0.0445     | (0.2709) |
| $\beta_{fri}$       | 0.0568      | (0.1287) | -0.0621    | (0.2535) | 0.1818     | (0.2799) |
| $\beta_{sat}$       | 0.0189      | (0.1355) | -0.0673    | (0.1703) | -0.0513    | (0.2710) |
| $\beta_{Tinterval}$ | -3.9525***  | (0.1099) | -3.8665*** | (0.2467) | -3.9559*** | (0.4298) |

Significance levels: \*  $p < 0.1$ ; \*\*  $p < 0.05$ ; \*\*\*  $p < 0.01$ . Standard errors are in parentheses.

**Table B3.** Parameter Estimates of App Choice (Entertainment Apps)

| Parameter           | Utilitarian |          | Social     |          | Hedonic    |          |
|---------------------|-------------|----------|------------|----------|------------|----------|
| $\beta_{morning}$   | -0.1553     | (0.1141) | -0.0671    | (0.3486) | 0.0779     | (0.2911) |
| $\beta_{day}$       | -0.1441     | (0.0928) | 0.1055     | (0.3183) | -0.1970    | (0.2302) |
| $\beta_{evening}$   | -0.3056***  | (0.0954) | -0.0057    | (0.3076) | -0.2271    | (0.2803) |
| $\beta_{home}$      | -0.7969***  | (0.0724) | 0.3597     | (0.2106) | -0.1355    | (0.1541) |
| $\beta_{way}$       | 1.1496***   | (0.1196) | -0.6494**  | (0.2635) | 0.0186     | (0.1592) |
| $\beta_{WiFi}$      | 0.0635      | (0.0527) | -0.0907    | (0.1708) | 0.1004     | (0.1418) |
| $\beta_{tsocial}$   | 0.2446***   | (0.0518) | 0.1181     | (0.1341) | -0.0432    | (0.1387) |
| $\beta_{tinfo}$     | 0.2252***   | (0.0487) | 0.0550     | (0.1322) | 0.2021     | (0.1827) |
| $\beta_{tent}$      | -0.0828***  | (0.0304) | -0.1624*   | (0.0877) | 0.4902***  | (0.1052) |
| $\beta_{tshop}$     | 0.5555***   | (0.1664) | 0.0587     | (0.1623) | 0.0070     | (0.1121) |
| $\beta_{ttool}$     | 0.1696***   | (0.0506) | 0.0187     | (0.1261) | -0.0203    | (0.1091) |
| $\beta_{nsocial}$   | -0.1046     | (0.0650) | 0.3851     | (0.2364) | -0.1818    | (0.3409) |
| $\beta_{ninfo}$     | -0.2699***  | (0.0748) | 0.1218     | (0.3263) | -0.3113    | (0.5166) |
| $\beta_{nent}$      | -1.0723***  | (0.0551) | -1.0052*** | (0.1163) | -3.1190*** | (0.2892) |
| $\beta_{nshop}$     | -0.1995*    | (0.1170) | 0.3633     | (0.3881) | -0.0539    | (0.8320) |
| $\beta_{ntool}$     | -0.0799     | (0.0629) | 0.4704*    | (0.2769) | -0.5024    | (0.4300) |
| $\beta_{week1}$     | -0.2176***  | (0.0636) | -0.0786    | (0.2113) | -0.1125    | (0.1854) |
| $\beta_{week2}$     | -0.1757***  | (0.0633) | 0.0987     | (0.2041) | 0.0282     | (0.1523) |
| $\beta_{mon}$       | -0.0759     | (0.0885) | -0.0272    | (0.3104) | 0.0612     | (0.2804) |
| $\beta_{tues}$      | -0.1022     | (0.0916) | 0.0803     | (0.2997) | 0.0459     | (0.2594) |
| $\beta_{wed}$       | 0.0204      | (0.0908) | 0.0387     | (0.3119) | 0.0319     | (0.2717) |
| $\beta_{thur}$      | 0.0559      | (0.0885) | 0.0698     | (0.3064) | 0.1331     | (0.2349) |
| $\beta_{fri}$       | 0.2163**    | (0.0918) | 0.1537     | (0.2780) | 0.0691     | (0.2902) |
| $\beta_{sat}$       | 0.0869      | (0.0947) | -0.0712    | (0.2943) | 0.0292     | (0.2483) |
| $\beta_{Tinterval}$ | -3.9238***  | (0.1077) | -3.9868*** | (0.2565) | -3.8834*** | (0.4383) |

Significance levels: \*  $p < 0.1$ ; \*\*  $p < 0.05$ ; \*\*\*  $p < 0.01$ . Standard errors are in parentheses.

**Table B4.** Parameter Estimates of App Choice (Shopping Apps)

| Parameter           | Utilitarian |          | Social     |          | Hedonic    |          |
|---------------------|-------------|----------|------------|----------|------------|----------|
| $\beta_{morning}$   | 0.7905***   | (0.2201) | 0.0132     | (0.3299) | 1.0583***  | (0.2419) |
| $\beta_{day}$       | 0.8400***   | (0.1759) | 0.2295     | (0.3028) | 0.6792***  | (0.2614) |
| $\beta_{evening}$   | 0.5047***   | (0.1663) | 0.1301     | (0.2858) | 0.9570***  | (0.2123) |
| $\beta_{home}$      | -0.0808     | (0.1490) | -0.0282    | (0.1930) | 0.1990     | (0.1538) |
| $\beta_{way}$       | 0.0294      | (0.1804) | -0.0023    | (0.2313) | 0.4007**   | (0.1735) |
| $\beta_{WiFi}$      | -0.3643***  | (0.1303) | 0.1095     | (0.1588) | -0.3398*** | (0.1151) |
| $\beta_{tsocial}$   | 0.1849      | (0.1129) | 0.0438     | (0.1101) | -0.0738    | (0.1393) |
| $\beta_{tinfo}$     | 0.2031*     | (0.1131) | 0.0178     | (0.0943) | 0.2404**   | (0.1158) |
| $\beta_{tent}$      | 0.5061**    | (0.2174) | 0.0991***  | (0.0338) | 0.2672***  | (0.0575) |
| $\beta_{tshop}$     | -0.2250***  | (0.0809) | 1.0727***  | (0.2157) | -0.7510**  | (0.3556) |
| $\beta_{ttool}$     | 0.7232***   | (0.1314) | 0.0861     | (0.0609) | -0.0884    | (0.0616) |
| $\beta_{nsocial}$   | -0.0509     | (0.1517) | 0.3636*    | (0.1938) | -0.3487    | (0.5633) |
| $\beta_{ninfo}$     | -0.0593     | (0.2388) | 0.2656     | (0.1867) | -0.4599    | (0.4279) |
| $\beta_{nent}$      | 0.2430      | (0.1889) | 0.2057     | (0.1516) | -1.0921*** | (0.0407) |
| $\beta_{nshop}$     | -1.7882***  | (0.1021) | -3.6160*** | (0.3679) | -3.6160*** | (0.6772) |
| $\beta_{ntool}$     | -0.1074     | (0.2158) | 0.1494     | (0.2486) | -0.4909    | (0.4197) |
| $\beta_{week1}$     | 0.0368      | (0.1388) | 0.2622     | (0.2183) | 0.0706     | (0.1681) |
| $\beta_{week2}$     | 0.0701      | (0.1407) | -0.0152    | (0.1872) | 0.2692**   | (0.1137) |
| $\beta_{mon}$       | -0.0726     | (0.2075) | 0.2105     | (0.2972) | -0.0139    | (0.1327) |
| $\beta_{tues}$      | 0.0223      | (0.2094) | 0.1949     | (0.2791) | -0.0576    | (0.1860) |
| $\beta_{wed}$       | 0.1072      | (0.2251) | 0.0312     | (0.2782) | -0.1419**  | (0.0657) |
| $\beta_{thur}$      | 0.1671      | (0.2179) | 0.0497     | (0.3032) | -0.0709    | (0.1184) |
| $\beta_{fri}$       | 0.5413**    | (0.2312) | -0.0023    | (0.2655) | -0.0694    | (0.1562) |
| $\beta_{sat}$       | -0.1449     | (0.2053) | -0.0078    | (0.2651) | -0.0856    | (0.1828) |
| $\beta_{Tinterval}$ | -3.9876***  | (0.1343) | -3.7814*** | (0.2553) | -3.9865*** | (0.4241) |

Significance levels: \*  $p < 0.1$ ; \*\*  $p < 0.05$ ; \*\*\*  $p < 0.01$ . Standard errors are in parentheses.

**Table B5. Parameter Estimates of App Choice (Tool Apps)**

| Parameter           | Utilitarian |          | Social     |          | Hedonic    |          |
|---------------------|-------------|----------|------------|----------|------------|----------|
| $\beta_{morning}$   | 0.0102      | (0.1840) | -0.6016*   | (0.3528) | 0.0767     | (0.3032) |
| $\beta_{day}$       | 0.0375      | (0.1551) | -0.2816    | (0.3235) | 0.0677     | (0.2458) |
| $\beta_{evening}$   | 0.0051      | (0.1608) | -0.2279    | (0.3121) | 0.0530     | (0.2449) |
| $\beta_{home}$      | -0.3020***  | (0.1108) | 0.1969     | (0.2238) | -0.3182*   | (0.1751) |
| $\beta_{way}$       | 0.0487      | (0.1325) | -0.0658    | (0.2623) | -0.1125    | (0.1857) |
| $\beta_{WiFi}$      | 0.0275      | (0.0958) | 0.0493*    | (0.1733) | 0.1180     | (0.1737) |
| $\beta_{tsocial}$   | 0.1788      | (0.1269) | -0.0371    | (0.1381) | -0.0601*   | (0.0346) |
| $\beta_{tinfo}$     | 0.2194***   | (0.0837) | -0.0190    | (0.1405) | 0.3115**   | (0.1574) |
| $\beta_{tent}$      | 0.2304**    | (0.1024) | 0.1640***  | (0.0431) | 0.2790**   | (0.1152) |
| $\beta_{tshop}$     | 0.2583      | (0.1861) | 0.0872     | (0.1940) | -0.2218    | (0.3409) |
| $\beta_{ttool}$     | 0.0978      | (0.0631) | -0.1791    | (0.1388) | 0.0231     | (0.1759) |
| $\beta_{nsocial}$   | -0.1974*    | (0.1170) | 0.4426*    | (0.2399) | 0.0004     | (0.2781) |
| $\beta_{ninfo}$     | -0.3696*    | (0.1931) | 0.2977     | (0.3336) | -0.5410    | (0.4909) |
| $\beta_{nent}$      | -0.2489     | (0.1635) | 0.1565     | (0.1425) | -1.0895*** | (0.2451) |
| $\beta_{nshop}$     | -0.0024     | (0.2213) | 0.1416     | (0.3703) | 0.0778     | (0.7352) |
| $\beta_{ntool}$     | -1.2108***  | (0.0923) | -2.7952*** | (0.2726) | -3.3086*** | (0.4137) |
| $\beta_{week1}$     | -0.2022**   | (0.0979) | 0.0579     | (0.2283) | -0.1396    | (0.1829) |
| $\beta_{week2}$     | -0.1813*    | (0.1016) | 0.0231     | (0.2175) | 0.0359     | (0.1859) |
| $\beta_{mon}$       | -0.1394     | (0.1700) | -0.1595    | (0.3112) | 0.0170     | (0.2681) |
| $\beta_{tues}$      | -0.2328     | (0.1566) | 0.0348     | (0.3125) | -0.0362    | (0.2683) |
| $\beta_{wed}$       | -0.1002     | (0.1562) | -0.0931    | (0.3138) | 0.0242     | (0.2872) |
| $\beta_{thur}$      | -0.0573     | (0.1734) | -0.1182    | (0.3144) | 0.0472     | (0.2346) |
| $\beta_{fri}$       | -0.1231     | (0.1583) | 0.0681     | (0.2893) | 0.0188     | (0.2895) |
| $\beta_{sat}$       | -0.0002     | (0.1646) | -0.0029    | (0.2993) | 0.0757     | (0.2438) |
| $\beta_{Tinterval}$ | -3.9303***  | (0.1279) | -3.9982*** | (0.2565) | -3.9869*** | (0.4359) |

Significance levels: \*  $p < 0.1$ ; \*\*  $p < 0.05$ ; \*\*\*  $p < 0.01$ . Standard errors are in parentheses.

**Table B6.** Parameter Estimates of App Choice (Intrinsic and Heterogeneity Parameters)

| $\alpha_{jv}$ : Intrinsic value of using app $v$ in state $j$ |             |          |            |          |            |          |
|---------------------------------------------------------------|-------------|----------|------------|----------|------------|----------|
|                                                               | Utilitarian |          | Social     |          | Hedonic    |          |
| $v = \text{social}$                                           | -1.4603***  | (0.1540) | 0.4152     | (0.3631) | 0.6586     | (0.4455) |
| $v = \text{information}$                                      | -1.7972***  | (0.1744) | -1.5009*** | (0.2189) | -0.6346    | (0.3912) |
| $v = \text{entertainment}$                                    | -3.1149***  | (0.1536) | 0.5355     | (0.3647) | 0.4898     | (0.3589) |
| $v = \text{shopping}$                                         | -2.9849***  | (0.2868) | -0.5510    | (0.3549) | -0.9884*** | (0.3396) |
| $v = \text{tool}$                                             | -1.3428***  | (0.2431) | -1.9594*** | (0.3956) | -1.4096*** | (0.3603) |
| Unobserved Heterogeneity                                      |             |          |            |          |            |          |
| $\eta$                                                        | 0           |          |            |          | 0.8362***  |          |
| Prob( $\eta$ )                                                | 0.4012      |          |            |          | 0.5988***  |          |

Significance levels: \*  $p < 0.1$ ; \*\*  $p < 0.05$ ; \*\*\*  $p < 0.01$ . Standard errors are in parentheses.

### C. Main Model Parameter Estimates of State-dependent App Usage Duration

**Table C1.** Parameter Estimates of App Usage Duration (Social Apps)

| Parameter            | Utilitarian |          | Social     |          | Hedonic    |          |
|----------------------|-------------|----------|------------|----------|------------|----------|
| $\delta_{morning}$   | -0.1006     | (0.1285) | -0.1229    | (0.1033) | -0.1425    | (0.1339) |
| $\delta_{day}$       | 0.0110      | (0.1088) | -0.1887**  | (0.0928) | -0.2133**  | (0.1032) |
| $\delta_{evening}$   | 0.0255      | (0.1100) | -0.1384    | (0.0885) | -0.1919*   | (0.1099) |
| $\delta_{home}$      | -3.4470***  | (0.0880) | 3.9998***  | (0.0339) | -2.4458*** | (0.0034) |
| $\delta_{way}$       | 1.7253***   | (0.0663) | -0.5012*** | (0.0743) | -1.9378*** | (0.0606) |
| $\delta_{WiFi}$      | 0.0047      | (0.0631) | -0.0136    | (0.0477) | 0.1458***  | (0.0346) |
| $\delta_{tsocial}$   | -0.1876***  | (0.0311) | -0.1996*** | (0.0302) | -0.5024*** | (0.0345) |
| $\delta_{tinfo}$     | -0.0311     | (0.0920) | -0.0378    | (0.0615) | 0.0491     | (0.0691) |
| $\delta_{tent}$      | 0.0034      | (0.0559) | -0.0487    | (0.1037) | 0.0245     | (0.0922) |
| $\delta_{tshop}$     | -0.0516     | (0.1775) | -0.1192    | (0.1311) | 0.0216     | (0.1805) |
| $\delta_{ttool}$     | -0.0821     | (0.0607) | -0.0201    | (0.0831) | -0.0822    | (0.0698) |
| $\delta_{nsocial}$   | 0.4019***   | (0.0296) | 0.3660***  | (0.0563) | 0.5949***  | (0.0400) |
| $\delta_{ninfo}$     | 0.0517      | (0.1276) | 0.0385     | (0.1396) | -0.0597    | (0.1014) |
| $\delta_{nent}$      | 0.0413      | (0.0719) | 0.0550     | (0.1399) | -0.0135    | (0.0745) |
| $\delta_{nshop}$     | -0.0084     | (0.1643) | -0.0217    | (0.0955) | -0.0323    | (0.1237) |
| $\delta_{ntool}$     | 0.1170      | (0.0814) | 0.0230     | (0.1184) | 0.1159*    | (0.0679) |
| $\delta_{week1}$     | 0.0179      | (0.0581) | 0.0041     | (0.0587) | -0.0433    | (0.0691) |
| $\delta_{week2}$     | 0.0274      | (0.0555) | 0.0277     | (0.0782) | 0.0250     | (0.0574) |
| $\delta_{mon}$       | 0.0306      | (0.1001) | -0.0486    | (0.0950) | 0.0144     | (0.1098) |
| $\delta_{tues}$      | -0.0988     | (0.0850) | -0.0395    | (0.1055) | -0.1006    | (0.1091) |
| $\delta_{wed}$       | -0.0180     | (0.0873) | -0.0181    | (0.1027) | -0.0670    | (0.1185) |
| $\delta_{thur}$      | 0.0322      | (0.0880) | -0.0270    | (0.0945) | -0.1243    | (0.1048) |
| $\delta_{fri}$       | -0.0080     | (0.0971) | -0.0506    | (0.1086) | -0.1116    | (0.1155) |
| $\delta_{sat}$       | 0.0436      | (0.0813) | -0.0231    | (0.0914) | -0.0607    | (0.1066) |
| $\delta_{Tinterval}$ | 0.0121      | (0.0260) | -0.0187    | (0.0293) | -0.0668**  | (0.0329) |

Significance levels: \*  $p < 0.1$ ; \*\*  $p < 0.05$ ; \*\*\*  $p < 0.01$ . Standard errors are in parentheses.

**Table C2. Parameter Estimates of App Usage Duration (Information Apps)**

| Parameter            | Utilitarian |          | Social    |          | Hedonic   |          |
|----------------------|-------------|----------|-----------|----------|-----------|----------|
| $\delta_{morning}$   | -0.0103     | (0.1260) | 0.1472    | (0.2246) | -0.1196   | (0.2248) |
| $\delta_{day}$       | 0.0963      | (0.1060) | 0.1832*   | (0.1019) | -0.0409   | (0.1399) |
| $\delta_{evening}$   | 0.0887      | (0.1072) | 0.2049    | (0.2290) | 0.0111    | (0.1693) |
| $\delta_{home}$      | 0.2132***   | (0.0763) | 0.2666*** | (0.0728) | -0.0029   | (0.1381) |
| $\delta_{way}$       | 0.2651***   | (0.0019) | 0.0535    | (0.1959) | 0.1980    | (0.1787) |
| $\delta_{WiFi}$      | 0.0315      | (0.0574) | -0.2799** | (0.1303) | 0.1270    | (0.1144) |
| $\delta_{tsocial}$   | -0.0059     | (0.0502) | 0.0257    | (0.0843) | -0.0615   | (0.1174) |
| $\delta_{tinfo}$     | -0.3804***  | (0.0318) | -0.1232** | (0.0490) | -0.1326** | (0.0598) |
| $\delta_{tent}$      | -0.0129     | (0.0696) | 0.0711    | (0.1264) | 0.0482    | (0.1041) |
| $\delta_{tshop}$     | -0.4172***  | (0.0386) | -0.1498   | (0.1238) | -0.1200   | (0.4447) |
| $\delta_{ttool}$     | 0.0061      | (0.0791) | -0.0165   | (0.1875) | 0.0023    | (0.0969) |
| $\delta_{nsocial}$   | 0.1758      | (0.1093) | 0.0269    | (0.1403) | 0.3813*** | (0.0913) |
| $\delta_{ninfo}$     | 0.5723***   | (0.0849) | 0.2716**  | (0.1292) | 0.2148*** | (0.0797) |
| $\delta_{nent}$      | -0.1591     | (0.1559) | -0.1162   | (0.1218) | -0.2046   | (0.1702) |
| $\delta_{nshop}$     | 0.6059***   | (0.0990) | 0.3336**  | (0.1468) | 0.3992    | (0.3446) |
| $\delta_{ntool}$     | -0.1437     | (0.1376) | -0.1448   | (0.0956) | 0.0185    | (0.1635) |
| $\delta_{week1}$     | 0.0369      | (0.0704) | 0.0267    | (0.1687) | 0.0751    | (0.1433) |
| $\delta_{week2}$     | 0.1606**    | (0.0777) | 0.0234    | (0.1814) | 0.0810    | (0.1652) |
| $\delta_{mon}$       | 0.0250      | (0.1155) | 0.1627    | (0.2376) | 0.0057    | (0.1985) |
| $\delta_{tues}$      | 0.1678      | (0.1174) | 0.1271    | (0.2325) | -0.0666   | (0.2039) |
| $\delta_{wed}$       | 0.1154      | (0.1038) | 0.0397    | (0.2246) | 0.0255    | (0.1927) |
| $\delta_{thur}$      | 0.1171      | (0.1169) | -0.0233   | (0.1697) | 0.0732    | (0.1578) |
| $\delta_{fri}$       | 0.0178      | (0.1160) | -0.0922   | (0.2099) | -0.1020   | (0.1622) |
| $\delta_{sat}$       | 0.1094      | (0.1205) | 0.0528    | (0.2524) | -0.0125   | (0.2043) |
| $\delta_{Tinterval}$ | -0.0729**   | (0.0331) | -0.0400   | (0.0666) | -0.0002   | (0.0543) |

Significance levels: \*  $p < 0.1$ ; \*\*  $p < 0.05$ ; \*\*\*  $p < 0.01$ . Standard errors are in parentheses.

**Table C3.** Parameter Estimates of App Usage Duration (Entertainment Apps)

| Parameter            | Utilitarian |          | Social     |          | Hedonic   |          |
|----------------------|-------------|----------|------------|----------|-----------|----------|
| $\delta_{morning}$   | 0.0241      | (0.1166) | -0.1615    | (0.1197) | 0.1308    | (0.1554) |
| $\delta_{day}$       | 0.0558      | (0.0989) | -0.1193    | (0.1150) | -0.0796   | (0.1596) |
| $\delta_{evening}$   | 0.0867      | (0.0971) | -0.1215    | (0.0867) | -0.0263   | (0.1135) |
| $\delta_{home}$      | -0.5110***  | (0.0426) | -0.4186*** | (0.0929) | -0.0301   | (0.0728) |
| $\delta_{way}$       | -2.7110***  | (0.1332) | 1.1167***  | (0.1109) | -0.1179   | (0.1179) |
| $\delta_{WiFi}$      | -0.2371***  | (0.0472) | -0.1508**  | (0.0619) | -0.0384   | (0.0816) |
| $\delta_{tsocial}$   | 0.0158      | (0.0454) | -0.0830**  | (0.0392) | -0.0653   | (0.0528) |
| $\delta_{tinfo}$     | -0.1604***  | (0.0510) | -0.0890**  | (0.0450) | -0.0831   | (0.0546) |
| $\delta_{tent}$      | -0.2916***  | (0.0314) | -0.1570*** | (0.0381) | -0.1542** | (0.0735) |
| $\delta_{tshop}$     | -0.2409     | (0.1623) | -0.0711    | (0.1241) | -0.1073   | (1.0121) |
| $\delta_{ttool}$     | -0.1019*    | (0.0540) | -0.0346    | (0.0982) | -0.0351   | (0.2146) |
| $\delta_{nsocial}$   | 0.0031      | (0.0699) | 0.1350     | (0.0875) | -0.0073   | (0.3301) |
| $\delta_{ninfo}$     | 0.2748***   | (0.0307) | 0.1153***  | (0.0299) | 0.2069    | (0.2899) |
| $\delta_{nent}$      | 0.6576***   | (0.0566) | 0.5247***  | (0.0623) | 0.2003    | (0.3286) |
| $\delta_{nshop}$     | -0.2105*    | (0.1123) | -0.2915*** | (0.1060) | -0.0547   | (0.2594) |
| $\delta_{ntool}$     | 0.1297***   | (0.0458) | -0.0094    | (0.0915) | 0.0398    | (0.1346) |
| $\delta_{week1}$     | 0.1771***   | (0.0592) | 0.0446     | (0.0527) | 0.0108    | (0.0954) |
| $\delta_{week2}$     | 0.0167      | (0.0603) | -0.0406    | (0.0530) | 0.0139    | (0.1076) |
| $\delta_{mon}$       | -0.0724     | (0.0842) | -0.0068    | (0.0377) | 0.0219    | (0.1404) |
| $\delta_{tues}$      | -0.0616     | (0.1058) | 0.0396     | (0.0686) | 0.0355    | (0.0976) |
| $\delta_{wed}$       | -0.1808*    | (0.0937) | -0.0269    | (0.0308) | -0.0115   | (0.1200) |
| $\delta_{thur}$      | -0.1531     | (0.1068) | -0.0088    | (0.0157) | -0.0094   | (0.1244) |
| $\delta_{fri}$       | -0.2457**   | (0.0984) | -0.1053    | (0.0877) | 0.0129    | (0.1227) |
| $\delta_{sat}$       | -0.1010     | (0.0994) | 0.0269     | (0.0900) | -0.0406   | (0.1576) |
| $\delta_{Tinterval}$ | 0.0094      | (0.0319) | 0.0248     | (0.0242) | -0.0030   | (0.0816) |

Significance levels: \*  $p < 0.1$ ; \*\*  $p < 0.05$ ; \*\*\*  $p < 0.01$ . Standard errors are in parentheses.

**Table C4. Parameter Estimates of App Usage Duration (Shopping Apps)**

| Parameter            | Utilitarian |          | Social    |          | Hedonic    |          |
|----------------------|-------------|----------|-----------|----------|------------|----------|
| $\delta_{morning}$   | -0.2473     | (0.2089) | 0.2034    | (0.1714) | -1.4386*** | (0.1282) |
| $\delta_{day}$       | -0.0816     | (0.1623) | 0.1719    | (0.1595) | -1.4578*** | (0.1684) |
| $\delta_{evening}$   | 0.1791      | (0.1451) | 0.2187    | (0.1399) | -1.5711*** | (0.0675) |
| $\delta_{home}$      | 0.0699      | (0.1402) | -0.1277   | (0.1814) | 0.0775     | (0.2036) |
| $\delta_{way}$       | 0.3592*     | (0.1847) | 0.1660    | (0.1973) | -0.2291    | (0.1509) |
| $\delta_{WiFi}$      | -0.3801***  | (0.1260) | 0.0515    | (0.1158) | -0.1400    | (0.2055) |
| $\delta_{tsocial}$   | -0.0917     | (0.1140) | 0.0317    | (0.0988) | -0.0114    | (0.0948) |
| $\delta_{tinfo}$     | -0.1766     | (0.2303) | 0.0136    | (0.0564) | 0.4175***  | (0.1090) |
| $\delta_{tent}$      | -0.1093     | (0.3560) | -0.1011   | (0.1121) | 0.2312**   | (0.1139) |
| $\delta_{tshop}$     | -0.5059***  | (0.0679) | -0.6771** | (0.2888) | 1.0096***  | (0.0384) |
| $\delta_{ttool}$     | 0.6330***   | (0.1227) | -0.0809   | (0.1622) | -0.4032*** | (0.0615) |
| $\delta_{nsocial}$   | 0.4322**    | (0.1893) | -0.0823   | (0.1758) | 0.0335     | (0.2636) |
| $\delta_{ninfo}$     | 0.4953***   | (0.1658) | 0.0348    | (0.2949) | -0.1382    | (0.2438) |
| $\delta_{nent}$      | 0.0434      | (0.4305) | 0.0599    | (0.2280) | -0.3354    | (0.2192) |
| $\delta_{nshop}$     | 1.7581***   | (0.0461) | 0.4408*** | (0.1177) | -1.1253*** | (0.1281) |
| $\delta_{ntool}$     | -0.4608***  | (0.1222) | -0.0511   | (0.1975) | -0.1635    | (0.1072) |
| $\delta_{week1}$     | -0.0685     | (0.1441) | -0.2928*  | (0.1772) | -0.1070    | (0.2103) |
| $\delta_{week2}$     | -0.2357*    | (0.1241) | -0.2714*  | (0.1625) | -0.4684**  | (0.2223) |
| $\delta_{mon}$       | -0.3013     | (0.2382) | -0.1224   | (0.2650) | 0.1176     | (0.3178) |
| $\delta_{tues}$      | -0.7749***  | (0.2289) | -0.2247   | (0.2468) | 0.3393     | (0.3512) |
| $\delta_{wed}$       | -0.6275***  | (0.2387) | -0.1636   | (0.2601) | 0.2648***  | (0.0985) |
| $\delta_{thur}$      | -0.5437***  | (0.2079) | -0.1223   | (0.2836) | 0.6471**   | (0.2735) |
| $\delta_{fri}$       | -0.6161***  | (0.2314) | -0.0917   | (0.2670) | -0.0168    | (0.2888) |
| $\delta_{sat}$       | -0.1701     | (0.2002) | -0.0939   | (0.2853) | 0.5078     | (0.3793) |
| $\delta_{Tinterval}$ | -0.0398     | (0.0682) | 0.1280**  | (0.0616) | 0.0471     | (0.1110) |

Significance levels: \*  $p < 0.1$ ; \*\*  $p < 0.05$ ; \*\*\*  $p < 0.01$ . Standard errors are in parentheses.

**Table C5. Parameter Estimates of App Usage Duration (Tool Apps)**

| Parameter            | Utilitarian |          | Social     |          | Hedonic  |          |
|----------------------|-------------|----------|------------|----------|----------|----------|
| $\delta_{morning}$   | -0.0286     | (0.1539) | 0.1002     | (0.1097) | -0.1881  | (0.1634) |
| $\delta_{day}$       | -0.0205     | (0.1434) | 0.4461***  | (0.1073) | 0.0513   | (0.0981) |
| $\delta_{evening}$   | -0.1204     | (0.1427) | 0.2512**   | (0.1112) | 0.0632   | (0.1134) |
| $\delta_{home}$      | -0.5142***  | (0.1071) | -0.3368*** | (0.0736) | -0.1292  | (0.1150) |
| $\delta_{way}$       | -0.4029***  | (0.1078) | -0.0999    | (0.0925) | -0.1578  | (0.2148) |
| $\delta_{WiFi}$      | -0.0510     | (0.0906) | 0.0713     | (0.0582) | -0.1659  | (0.1150) |
| $\delta_{tsocial}$   | -0.1193*    | (0.0705) | -0.0205    | (0.0474) | -0.0262  | (0.0830) |
| $\delta_{tinfo}$     | 0.0509      | (0.1022) | -0.1262**  | (0.0599) | 0.0647   | (0.0748) |
| $\delta_{tent}$      | -0.1217     | (0.0875) | -0.0503    | (0.0632) | -0.0111  | (0.2565) |
| $\delta_{tshop}$     | -0.0226     | (0.5565) | -0.1268**  | (0.0563) | 0.1063   | (0.1633) |
| $\delta_{ttool}$     | -0.4707***  | (0.0549) | -0.1201*** | (0.0330) | -0.0824* | (0.0489) |
| $\delta_{nsocial}$   | 0.2460***   | (0.0835) | 0.3181***  | (0.0528) | 0.0451   | (0.0597) |
| $\delta_{ninfo}$     | -0.0526     | (0.2422) | 0.2837***  | (0.0899) | -0.1142  | (0.0744) |
| $\delta_{nent}$      | 0.4305***   | (0.1017) | 0.2090***  | (0.0694) | 0.0690   | (0.1139) |
| $\delta_{nshop}$     | -0.4231**   | (0.2040) | -0.1340*** | (0.0176) | -0.1844  | (0.3384) |
| $\delta_{ntool}$     | 0.4198***   | (0.0762) | 0.0535     | (0.0418) | 0.1677   | (0.1050) |
| $\delta_{week1}$     | -0.0379     | (0.0972) | -0.0115    | (0.0584) | -0.0423  | (0.1213) |
| $\delta_{week2}$     | -0.0255     | (0.0990) | 0.0689     | (0.0628) | -0.0491  | (0.2176) |
| $\delta_{mon}$       | 0.0542      | (0.1508) | 0.0684     | (0.1051) | -0.0401  | (0.0616) |
| $\delta_{tues}$      | -0.0055     | (0.1255) | -0.0727    | (0.0884) | 0.0931   | (0.1784) |
| $\delta_{wed}$       | 0.1161      | (0.1380) | 0.0526     | (0.0874) | 0.1102   | (0.2474) |
| $\delta_{thur}$      | 0.1496      | (0.1686) | 0.0426     | (0.0968) | 0.0593   | (0.1879) |
| $\delta_{fri}$       | -0.0983     | (0.1483) | -0.0859    | (0.0761) | 0.0744   | (0.1377) |
| $\delta_{sat}$       | 0.1782      | (0.1462) | 0.0210     | (0.1087) | 0.0549   | (0.0515) |
| $\delta_{Tinterval}$ | 0.0100      | (0.0712) | 0.0576*    | (0.0296) | 0.0032   | (0.0964) |

Significance levels: \*  $p < 0.1$ ; \*\*  $p < 0.05$ ; \*\*\*  $p < 0.01$ . Standard errors are in parentheses.

**Table C6.** Parameter Estimates of App Usage Duration (Intrinsic and Heterogeneity Parameters)

| Intrinsic value of using app $v$ in state $j$ |             |          |            |          |            |          |
|-----------------------------------------------|-------------|----------|------------|----------|------------|----------|
|                                               | Utilitarian |          | Social     |          | Hedonic    |          |
| $v = \text{social}$                           | -1.1711***  | (0.1369) | -4.7679*** | (0.1825) | 0.4636***  | (0.1184) |
| $v = \text{information}$                      | -2.0243***  | (0.3177) | -0.4871**  | (0.2116) | -0.6364*** | (0.1188) |
| $v = \text{entertainment}$                    | -0.4362     | (0.3322) | -0.4019*** | (0.1497) | -1.3142*** | (0.2773) |
| $v = \text{shopping}$                         | 0.5451***   | (0.1593) | 0.6579***  | (0.1493) | 0.2736     | (0.2247) |
| $v = \text{tool}$                             | -0.9603***  | (0.1618) | -0.2561*** | (0.0768) | -0.5561**  | (0.2506) |
| Unobserved Heterogeneity                      |             |          |            |          |            |          |
| $\tau$                                        | 0           |          |            |          | 0.0136     |          |
| Prob( $\tau$ )                                | 0.2251      |          |            |          | 0.7749***  |          |

Significance levels: \*  $p < 0.1$ ; \*\*  $p < 0.05$ ; \*\*\*  $p < 0.01$ . Standard errors are in parentheses.

## D. Main Model Parameter Estimates of Hidden State Transition

**Table D1.** Parameter Estimates of Hidden State Transition

| Parameter                    | Utilitarian |           | Social     |          | Hedonic    |          |
|------------------------------|-------------|-----------|------------|----------|------------|----------|
| $\gamma_{morning}$           | -0.1484     | (0.1250)  | -0.1770*   | (0.1073) | -0.4170*** | (0.1257) |
| $\gamma_{day}$               | -0.1857*    | (0.1048)  | -0.1996**  | (0.0809) | -0.1637    | (0.1218) |
| $\gamma_{evening}$           | -0.3481***  | (0.1027)  | -0.1864**  | (0.0772) | -0.1063    | (0.1220) |
| $\gamma_{home}$              | -0.5756***  | (0.0770)  | -0.3743*** | (0.0516) | -0.3224*** | (0.0902) |
| $\gamma_{way}$               | -0.3435***  | (0.0888)  | -0.1246*   | (0.0704) | -0.2023*   | (0.1038) |
| $\gamma_{WiFi}$              | -0.0969*    | (0.0589)  | -0.0044    | (0.0553) | 0.0258     | (0.0819) |
| $\gamma_{tsocial}$           | -0.0263     | (0.0351)  | -0.0125    | (0.0302) | -0.0873    | (0.0575) |
| $\gamma_{tinfo}$             | -0.1071**   | (0.0504)  | 0.0675     | (0.0693) | 0.0278     | (0.0698) |
| $\gamma_{tent}$              | 0.0298      | (0.0488)  | 0.0048     | (0.0363) | -0.2122**  | (0.1057) |
| $\gamma_{tshop}$             | -0.1715     | (0.1098)  | 0.4033***  | (0.0812) | 0.1951     | (0.1759) |
| $\gamma_{ttool}$             | 0.0293      | (0.0532)  | -0.0419    | (0.0432) | -0.1107    | (0.0787) |
| $\gamma_{nsocial}$           | 0.0100**    | (0.0494)  | 0.0071     | (0.0503) | 0.2410***  | (0.0729) |
| $\gamma_{ninfo}$             | 0.0867      | (0.0741)  | -0.0687    | (0.1158) | -0.3399*** | (0.0140) |
| $\gamma_{nent}$              | -0.1207     | (0.0772)  | 0.1756***  | (0.0569) | 0.3700***  | (0.1076) |
| $\gamma_{nshop}$             | 0.0783      | (0.1534)  | -0.5595*** | (0.0428) | -0.6450**  | (0.2580) |
| $\gamma_{ntool}$             | -0.1847***  | (0.0691)  | -0.0365    | (0.0560) | 0.1632*    | (0.0980) |
| $\gamma_{week1}$             | 0.0819      | (0.0610)  | -0.1270**  | (0.0521) | -0.0084    | (0.0899) |
| $\gamma_{week2}$             | 0.0153      | (0.0648)  | -0.0962*   | (0.0571) | -0.0139    | (0.0967) |
| $\gamma_{mon}$               | -0.0491     | (0.0987)  | -0.0780    | (0.0721) | -0.0142    | (0.1436) |
| $\gamma_{tues}$              | -0.0621     | (0.0990)  | -0.1193*   | (0.0639) | -0.0596    | (0.1453) |
| $\gamma_{wed}$               | -0.0705     | (0.1010)  | -0.0842    | (0.0664) | -0.0335    | (0.1404) |
| $\gamma_{thur}$              | -0.0423     | (0.1009)  | -0.0862    | (0.0694) | -0.0339    | (0.1532) |
| $\gamma_{fri}$               | -0.0671     | (0.01037) | -0.0253    | (0.0701) | -0.0113    | (0.1412) |
| $\gamma_{sat}$               | -0.0287     | (0.0985)  | 0.0048     | (0.0693) | -0.0319    | (0.1379) |
| $\gamma_{Tinterval}$         | 0.1610***   | (0.0312)  | 0.0719**   | (0.0335) | -0.1234*** | (0.0478) |
| $\mu_{jk}$ : Intrinsic terms |             |           |            |          |            |          |
| Utilitarian                  |             |           | -2.0152*** | (0.1530) | -1.3863*** | (0.1489) |
| Social                       | -0.4148***  | (0.1225)  |            |          | -0.6733*** | (0.1272) |
| Hedonic                      | -0.3512*    | (0.1838)  | -1.9112*** | (0.1761) |            |          |
| Unobserved Heterogeneity     |             |           |            |          |            |          |
| $\xi$                        | 0           |           |            |          | 0.9133**   |          |
| Prob( $\xi$ )                | 0.4763      |           |            |          | 0.5237**   |          |

## E. Other Estimation Results for the Main Model

### Marginal Effect of Previous App Usage Duration on Current App Usage Duration

We explore duration interdependence by examining the marginal effect of previous app usage duration (1 minute) on current app usage duration, using the intrinsic duration as the baseline. The results are shown below. Each sub-table corresponds to a specific internal state. In each table, numbers outside the parentheses are the marginal effects (i.e., differences of current usage duration after the previous usage duration to the intrinsic shares), while numbers inside are the current usage duration after the previous usage duration. For example, for the second cell in Table E1, 4.38 minutes is the usage duration of the information app (conditional on choosing it) after using social app, while the marginal effect, -0.54, is the difference of such usage duration to the intrinsic usage duration of information app (i.e.,  $-0.54 = 4.38 - 4.92$ ).

**Table E1.** Effects of Previous App Usage on Current Duration (Utilitarian State)

| $t \rightarrow t + 1$ | Social             | Information     | Entertainment   | Shopping           | Tool            |
|-----------------------|--------------------|-----------------|-----------------|--------------------|-----------------|
| Social                | -0.38***<br>(2.35) | -0.54<br>(4.38) | -0.04<br>(3.13) | -0.22<br>(0.82)    | -0.34<br>(3.79) |
| Information           | -0.04<br>(2.69)    | -0.61<br>(4.31) | -0.24<br>(2.93) | -0.21<br>(0.83)    | 0.01<br>(4.14)  |
| Entertainment         | -0.09<br>(2.64)    | 0.63<br>(5.55)  | -0.71<br>(2.46) | 0.05<br>(1.09)     | -0.79<br>(3.34) |
| Shopping              | 0.11<br>(2.84)     | -0.60<br>(4.32) | 1.16<br>(4.33)  | -0.60***<br>(0.44) | 1.50<br>(5.63)  |
| Tool                  | -0.07<br>(2.66)    | 0.50<br>(5.42)  | -0.06<br>(3.11) | -0.12<br>(0.92)    | 0.15<br>(4.28)  |
| Intrinsic Time        | (2.73)             | (4.92)          | (3.17)          | (1.04)             | (4.13)          |

Significance levels: \*  $p < 0.1$ ; \*\*  $p < 0.05$ ; \*\*\*  $p < 0.01$ .

**Table E2.** Effects of Previous App Usage on Current Duration (Social State)

| $t \rightarrow t + 1$ | Social          | Information     | Entertainment      | Shopping        | Tool            |
|-----------------------|-----------------|-----------------|--------------------|-----------------|-----------------|
| Social                | -0.41<br>(3.36) | -0.05<br>(1.21) | -0.06<br>(1.55)    | 0.02<br>(0.63)  | -0.21<br>(0.92) |
| Information           | -0.01<br>(3.76) | -0.13<br>(1.13) | -0.03<br>(1.58)    | -0.02<br>(0.59) | -0.12<br>(1.01) |
| Entertainment         | -0.02<br>(3.75) | 0.04<br>(1.30)  | -0.36***<br>(1.25) | 0.02<br>(0.63)  | -0.12<br>(1.01) |
| Shopping              | 0.38<br>(4.15)  | -0.15<br>(1.11) | 0.46**<br>(2.07)   | 0.11<br>(0.72)  | 0.22<br>(1.35)  |
| Tool                  | -0.01<br>(3.76) | 0.14<br>(1.40)  | 0.05<br>(1.66)     | 0.06<br>(0.67)  | 0.05<br>(1.18)  |
| Intrinsic Time        | (3.77)          | (1.26)          | (1.61)             | (0.61)          | (1.13)          |

Significance levels: \*  $p < 0.1$ ; \*\*  $p < 0.05$ ; \*\*\*  $p < 0.01$ .

**Table E3.** Effects of Previous App Usage on Current Duration (Hedonic State)

| $t \rightarrow t + 1$ | Social          | Information     | Entertainment   | Shopping        | Tool            |
|-----------------------|-----------------|-----------------|-----------------|-----------------|-----------------|
| Social                | -0.21<br>(3.15) | -0.33<br>(1.34) | 0.21<br>(4.30)  | -0.03<br>(2.45) | -0.03<br>(2.03) |
| Information           | 0.03<br>(3.39)  | -0.09<br>(1.58) | -0.33<br>(3.76) | -0.43<br>(2.05) | 0.07<br>(2.13)  |
| Entertainment         | -0.02<br>(3.34) | 0.19<br>(1.86)  | -0.13<br>(3.96) | 0.19<br>(2.67)  | -0.08<br>(1.98) |
| Shopping              | 0.03<br>(3.39)  | -0.29<br>(1.38) | 0.49<br>(4.58)  | 0.21<br>(2.69)  | 0.11<br>(2.17)  |
| Tool                  | -0.07<br>(3.29) | -0.02<br>(1.65) | -0.01<br>(4.08) | 1.20<br>(3.68)  | -0.12<br>(1.94) |
| Intrinsic Time        | (3.36)          | (1.67)          | (4.09)          | (2.48)          | (2.06)          |

Significance levels: \*  $p < 0.1$ ; \*\*  $p < 0.05$ ; \*\*\*  $p < 0.01$ .

## Posterior Analysis

### Figure E1. Posterior States Over Time (Bandwidth)

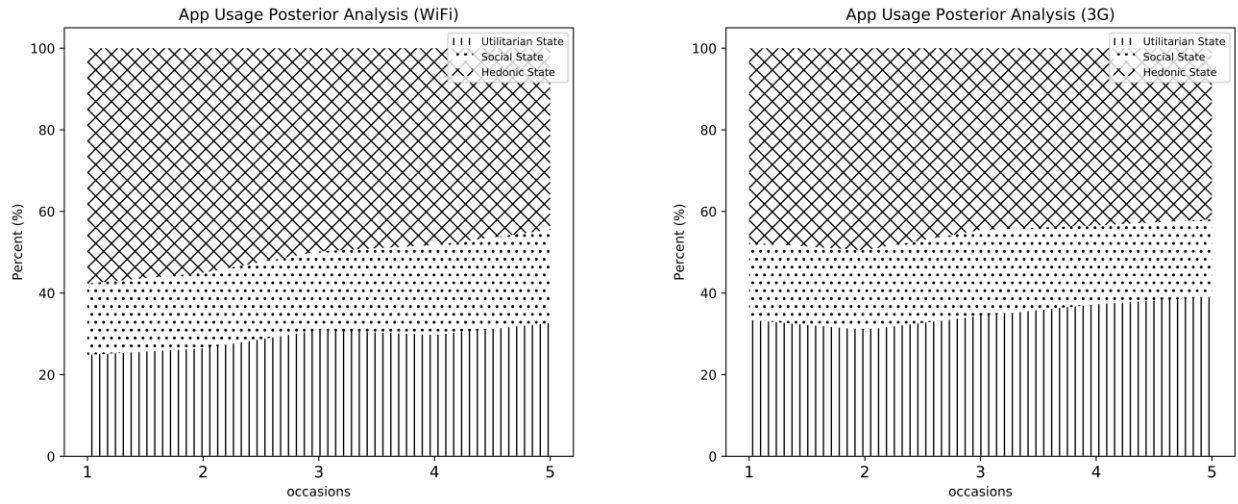

### Figure E2. Posterior States Over Time (Time of Day)

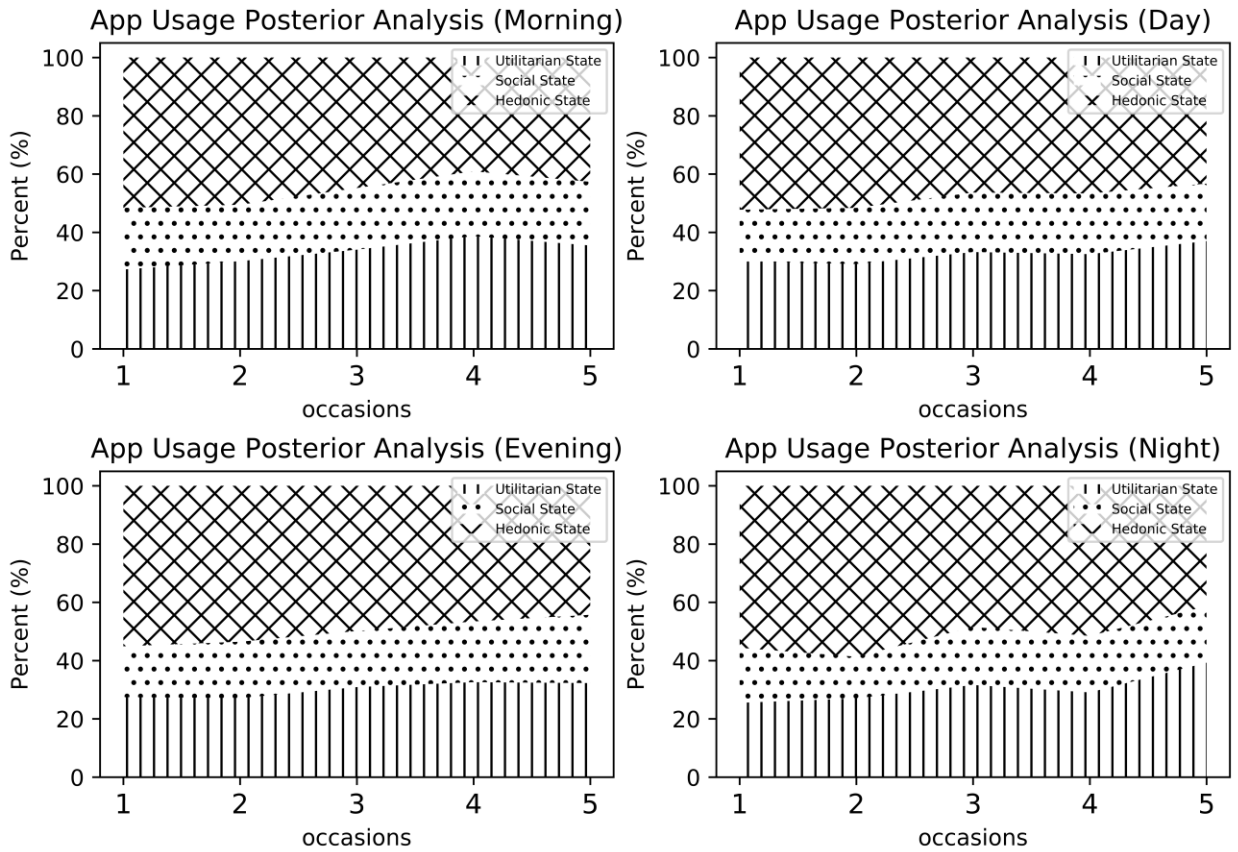

### Figure E3. Posterior States Over Time (Location)

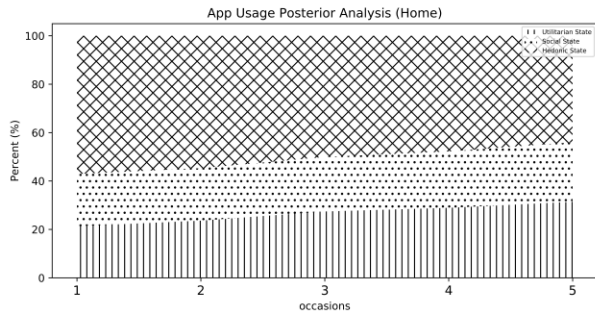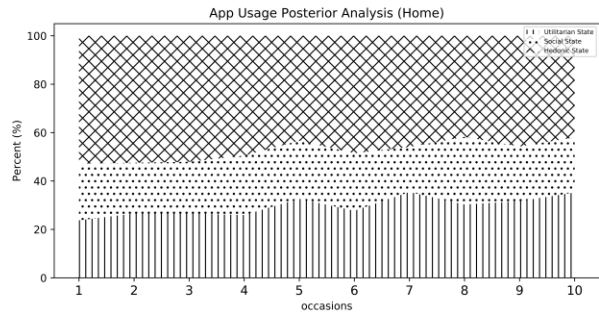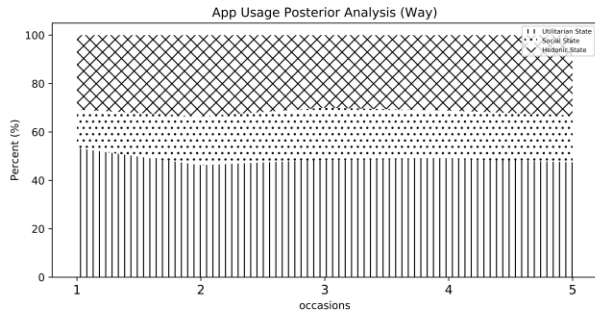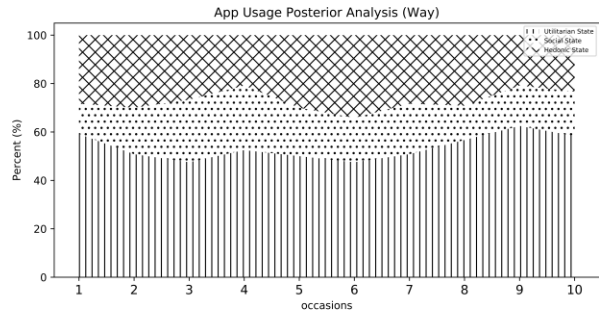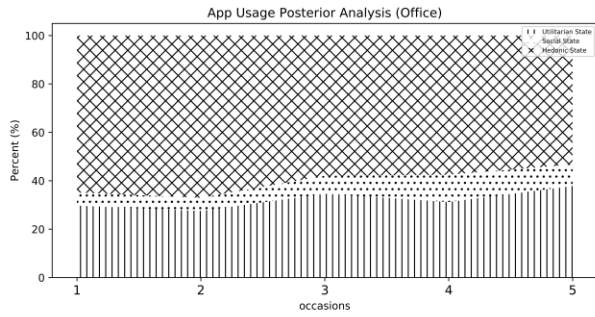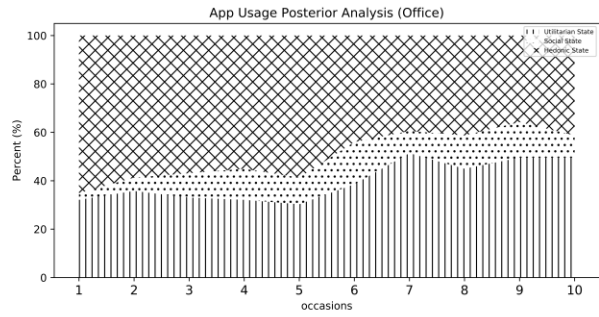

**Figure E4. Posterior States Over Time (First App)**

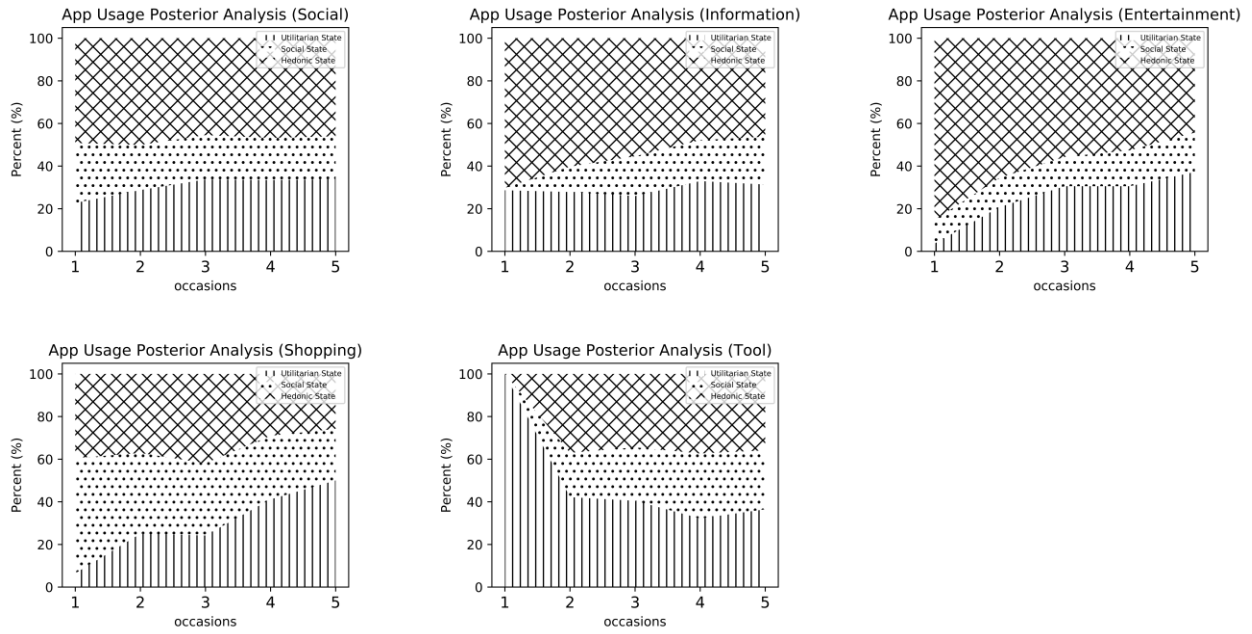

Figure E5. Posterior State Over Time (First and Second App Choices)

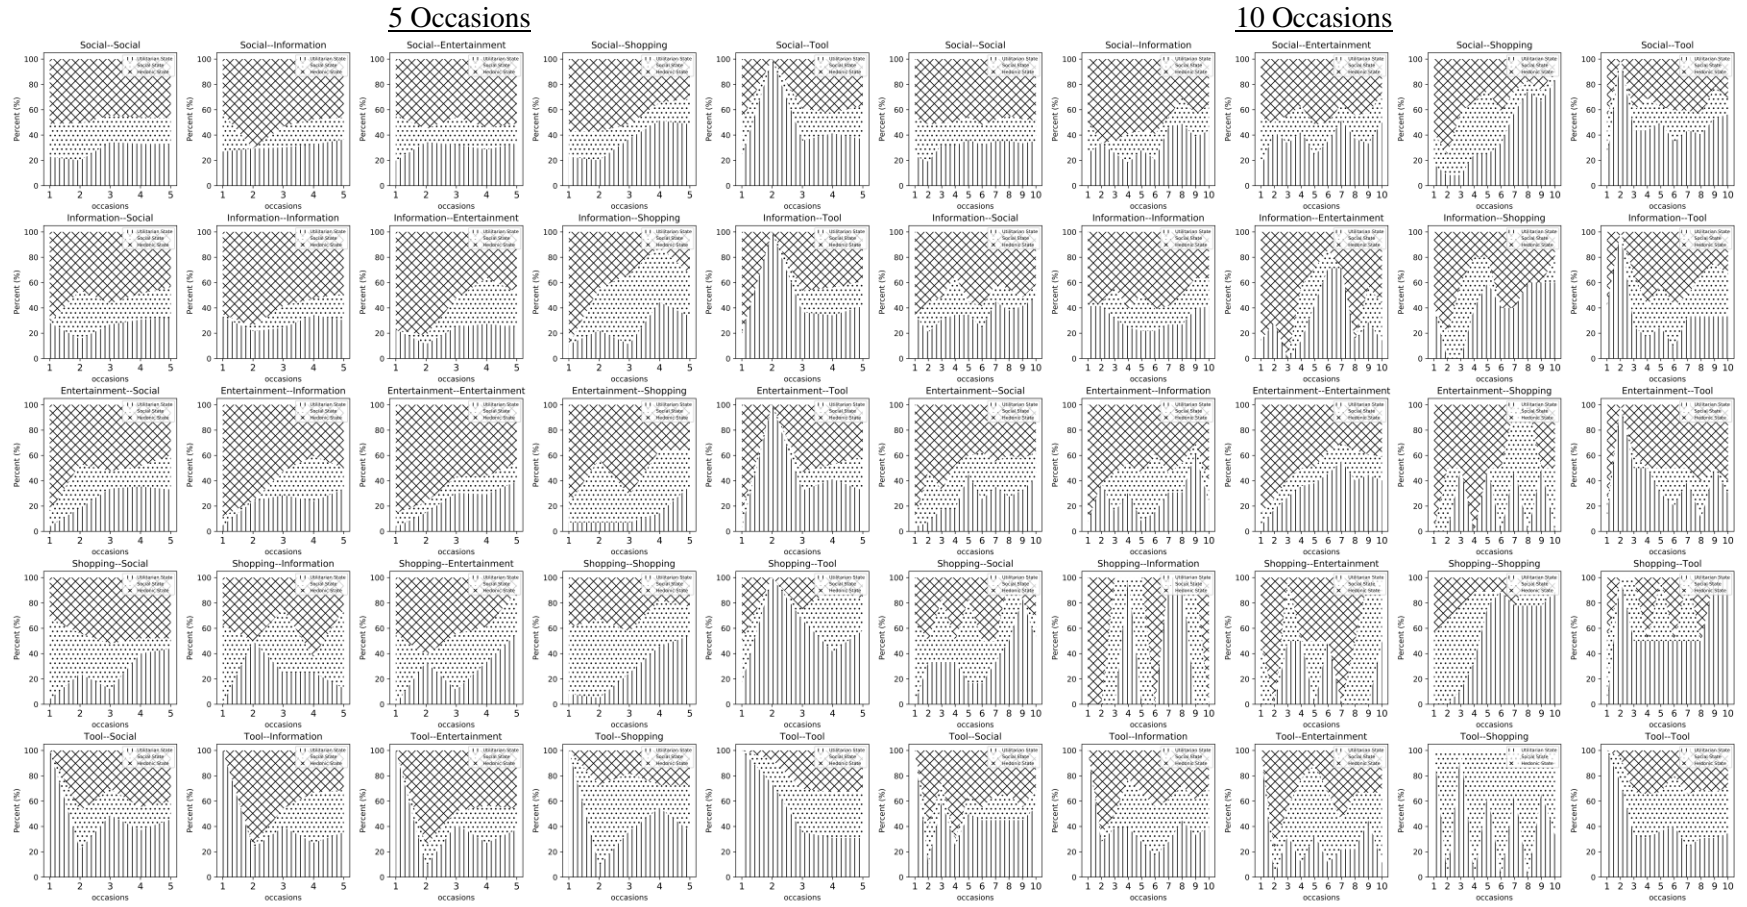

**Figure E6.** Posterior State Over Time (Session Examples)

5 Occasions

10 Occasions

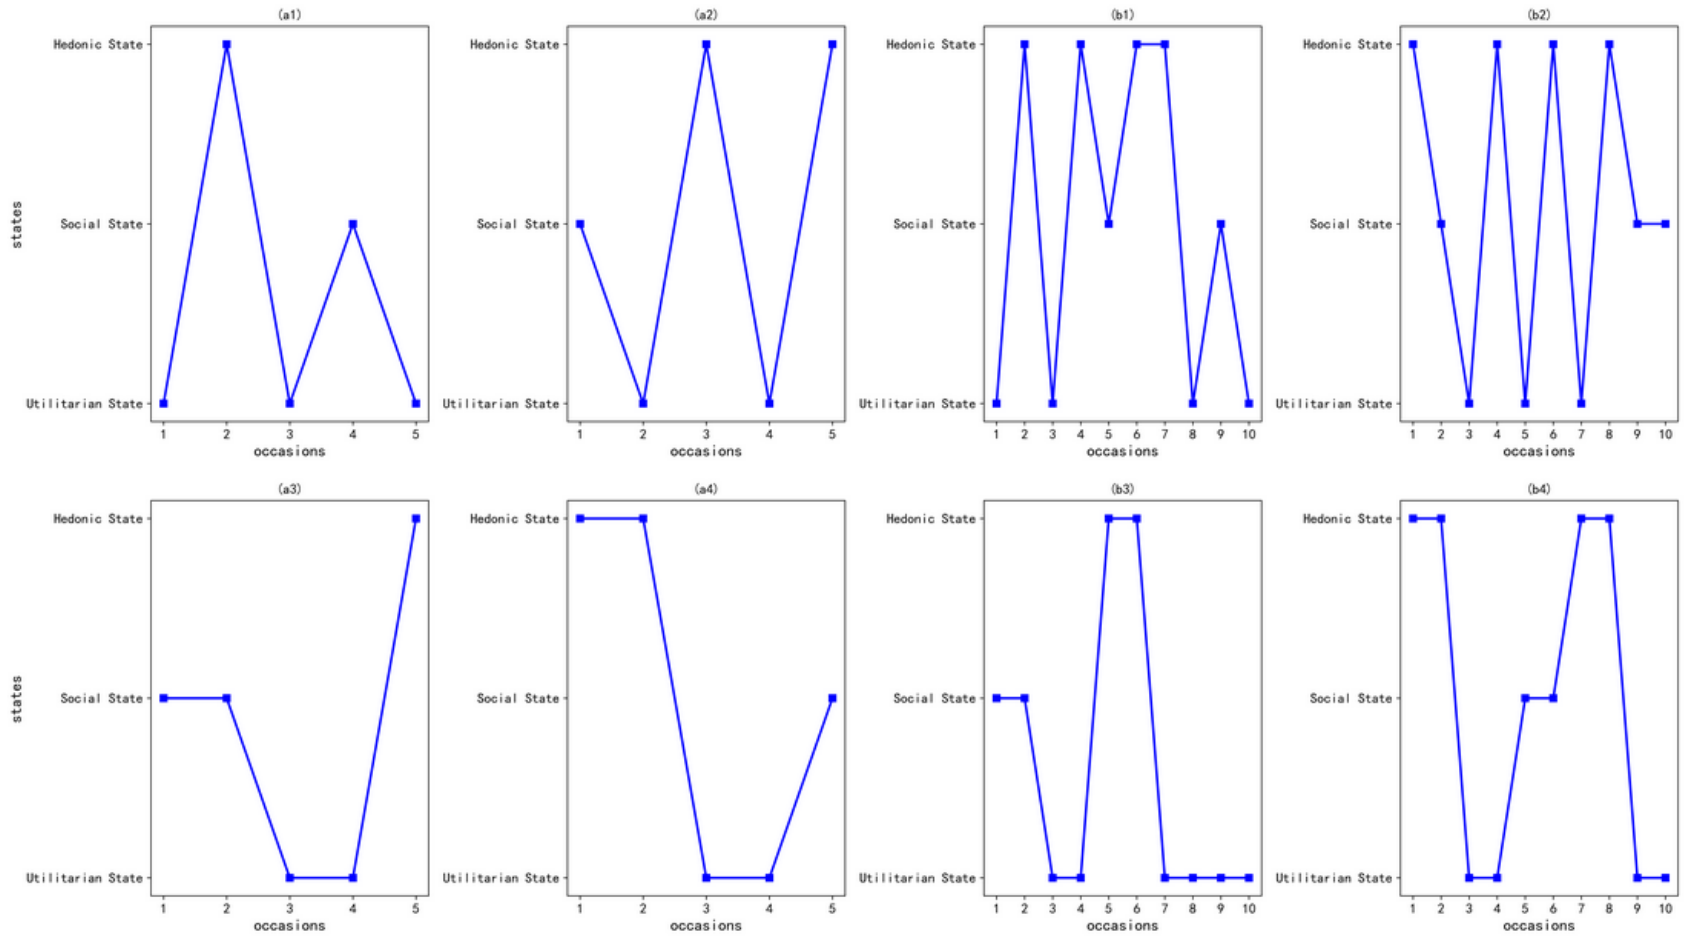

## F. Robustness Check – 15-Minute Threshold for Session Split

**Table F1.** Effects of Previous App Choice on Current Choice (Utilitarian State)

| $t \rightarrow t + 1$ | Social (%)       | Information (%)  | Entertainment (%) | Shopping (%)     | Tool (%)         | Stop  |
|-----------------------|------------------|------------------|-------------------|------------------|------------------|-------|
| Social                | 10.51<br>(35.09) | -1.55<br>(23.17) | -0.85<br>(7.49)   | -1.06<br>(2.48)  | -7.05<br>(31.77) | 56.06 |
| Information           | -9.63<br>(14.95) | 21.64<br>(46.36) | -3.73<br>(4.61)   | -1.32<br>(2.22)  | -6.96<br>(31.86) | 51.34 |
| Entertainment         | -3.01<br>(21.57) | -1.20<br>(23.52) | 7.91<br>(16.25)   | -1.33<br>(2.21)  | -2.37<br>(36.45) | 59.60 |
| Shopping              | -8.10<br>(16.48) | 1.94<br>(26.66)  | -0.90<br>(7.44)   | 11.78<br>(15.32) | -4.72<br>(34.10) | 61.16 |
| Tool                  | -9.86<br>(14.72) | -8.07<br>(16.65) | -2.68<br>(5.66)   | -2.13<br>(1.41)  | 22.74<br>(61.56) | 50.98 |
| Intrinsic Share       | (24.58)          | (24.72)          | (8.34)            | (3.54)           | (38.82)          | ----- |

**Table F2.** Effects of Previous App Choice on Current Choice (Social State)

| $t \rightarrow t + 1$ | Social (%)        | Information (%)  | Entertainment (%) | Shopping (%)     | Tool (%)         | Stop  |
|-----------------------|-------------------|------------------|-------------------|------------------|------------------|-------|
| Social                | 30.67<br>(86.82)  | -3.95<br>(1.47)  | -19.57<br>(8.45)  | -5.40<br>(2.56)  | -1.75<br>(0.70)  | 8.77  |
| Information           | -17.38<br>(38.77) | 32.21<br>(37.63) | -9.09<br>(18.93)  | -4.38<br>(3.58)  | -1.36<br>(1.09)  | 16.39 |
| Entertainment         | -12.10<br>(44.05) | -1.85<br>(3.57)  | 16.83<br>(44.85)  | -2.43<br>(5.53)  | -0.45<br>(2.00)  | 18.67 |
| Shopping              | -5.80<br>(50.35)  | -2.22<br>(3.20)  | -12.66<br>(15.36) | 21.92<br>(29.88) | -1.24<br>(1.21)  | 17.48 |
| Tool                  | -9.83<br>(46.32)  | 0.33<br>(5.75)   | -7.47<br>(20.55)  | -0.34<br>(7.62)  | 17.31<br>(19.76) | 21.45 |
| Intrinsic Share       | (56.15)           | (5.42)           | (28.02)           | (7.96)           | (2.45)           | ----- |

**Table F3.** Effects of Previous App Choice on Current Choice (Hedonic State)

| $t \rightarrow t + 1$ | Social (%)        | Information (%)  | Entertainment (%) | Shopping (%)     | Tool (%)         | Stop  |
|-----------------------|-------------------|------------------|-------------------|------------------|------------------|-------|
| Social                | 36.02<br>(71.25)  | -5.67<br>(5.03)  | -26.41<br>(19.89) | -1.40<br>(1.77)  | -2.54<br>(2.06)  | 12.00 |
| Information           | -9.39<br>(25.84)  | 20.63<br>(31.33) | -10.80<br>(35.50) | -0.41<br>(2.76)  | -0.03<br>(4.57)  | 19.36 |
| Entertainment         | -13.35<br>(21.88) | -7.23<br>(3.47)  | 25.29<br>(71.59)  | -2.01<br>(1.16)  | -2.70<br>(1.90)  | 9.26  |
| Shopping              | -15.30<br>(19.93) | -3.59<br>(7.11)  | -17.38<br>(28.92) | 38.17<br>(41.34) | -1.90<br>(2.70)  | 17.59 |
| Tool                  | -3.47<br>(31.76)  | -3.73<br>(6.97)  | -12.87<br>(33.43) | -0.60<br>(2.57)  | 20.67<br>(25.27) | 16.23 |
| Intrinsic Share       | (35.23)           | (10.70)          | (46.30)           | (3.17)           | (4.60)           | ----- |

**Table F4. Effects of Previous App Usage on Current Duration (Utilitarian State)**

| $t \rightarrow t + 1$ | Social          | Information     | Entertainment   | Shopping        | Tool            |
|-----------------------|-----------------|-----------------|-----------------|-----------------|-----------------|
| Social                | -0.45<br>(2.33) | -0.39<br>(4.49) | -0.33<br>(2.58) | -0.20<br>(0.78) | -0.77<br>(2.86) |
| Information           | -0.13<br>(2.65) | -1.31<br>(3.57) | 0.35<br>(3.26)  | -0.14<br>(0.84) | 0.45<br>(4.08)  |
| Entertainment         | 0.01<br>(2.79)  | 0.93<br>(5.81)  | -0.50<br>(2.41) | -0.12<br>(0.86) | -0.96<br>(2.67) |
| Shopping              | 0.21<br>(2.99)  | -0.38<br>(4.50) | 0.96<br>(3.87)  | -0.49<br>(0.49) | 0.78<br>(4.41)  |
| Tool                  | -0.33<br>(2.45) | 0.87<br>(5.75)  | -0.32<br>(2.59) | 0.03<br>(1.01)  | 1.08<br>(4.71)  |
| Intrinsic Time        | (2.78)          | (4.88)          | (2.91)          | (0.98)          | (3.63)          |

**Table F5. Effects of Previous App Usage on Current Duration (Social State)**

| $t \rightarrow t + 1$ | Social          | Information     | Entertainment   | Shopping        | Tool            |
|-----------------------|-----------------|-----------------|-----------------|-----------------|-----------------|
| Social                | -0.69<br>(3.20) | 0.05<br>(1.16)  | -0.11<br>(1.43) | 0.06<br>(0.66)  | -0.15<br>(0.68) |
| Information           | 0.40<br>(4.29)  | 0.06<br>(1.17)  | -0.12<br>(1.42) | -0.14<br>(0.46) | -0.07<br>(0.76) |
| Entertainment         | 0.00<br>(3.89)  | -0.02<br>(1.09) | -0.06<br>(1.48) | -0.08<br>(0.52) | -0.16<br>(0.67) |
| Shopping              | 1.40<br>(5.29)  | -0.08<br>(1.03) | 0.89<br>(2.43)  | 0.10<br>(0.70)  | 0.41<br>(1.24)  |
| Tool                  | 0.41<br>(4.30)  | 0.40<br>(1.51)  | -0.03<br>(1.51) | 0.16<br>(0.76)  | -0.03<br>(0.80) |
| Intrinsic Time        | (3.89)          | (1.11)          | (1.54)          | (0.60)          | (0.83)          |

**Table F6. Effects of Previous App Usage on Current Duration (Hedonic State)**

| $t \rightarrow t + 1$ | Social          | Information     | Entertainment   | Shopping        | Tool            |
|-----------------------|-----------------|-----------------|-----------------|-----------------|-----------------|
| Social                | -0.08<br>(3.68) | -0.53<br>(1.45) | -0.34<br>(2.49) | 0.35<br>(2.43)  | 0.22<br>(2.46)  |
| Information           | 0.79<br>(4.55)  | -0.05<br>(1.93) | -0.22<br>(2.61) | -0.11<br>(1.97) | -0.12<br>(2.12) |
| Entertainment         | -0.13<br>(3.63) | 0.04<br>(2.02)  | -0.05<br>(2.78) | 0.15<br>(2.23)  | -0.05<br>(2.19) |
| Shopping              | -0.08<br>(3.68) | -0.49<br>(1.49) | 0.12<br>(2.95)  | 0.13<br>(2.21)  | 0.58<br>(2.82)  |
| Tool                  | 0.98<br>(4.74)  | -0.12<br>(1.86) | 0.29<br>(3.12)  | 1.26<br>(3.34)  | -0.20<br>(2.04) |
| Intrinsic Time        | (3.76)          | (1.98)          | (2.83)          | (2.08)          | (2.24)          |

**Table F7. Intrinsic State Transition Matrix**

| $t \rightarrow t + 1$ | Utilitarian (%) | Social (%) | Hedonic (%) |
|-----------------------|-----------------|------------|-------------|
| Utilitarian           | 67.41           | 13.52      | 19.07       |
| Social                | 33.52           | 39.36      | 27.12       |
| Hedonic               | 37.84           | 8.56       | 53.60       |

**Table F8. Change in State Transition Probability: *WiFi* (Baseline: *3G*)**

| $t \rightarrow t + 1$ | Utilitarian (%)  | Social (%)      | Hedonic (%)      |
|-----------------------|------------------|-----------------|------------------|
| Utilitarian           | -1.72<br>(66.71) | 0.71<br>(13.81) | 1.01<br>(19.48)  |
| Social                | -0.41<br>(33.35) | 0.73<br>(39.67) | -0.32<br>(26.98) |
| Hedonic               | 0.70<br>(38.13)  | 0.16<br>(8.63)  | -0.86<br>(53.24) |

**Table F9. Change in State Transition Probability: Location (Baseline: *Office*)**

| $t \rightarrow t + 1$ | <i>Home</i> (%)   |                   |                  | <i>On the Way</i> (%) |                  |                  |
|-----------------------|-------------------|-------------------|------------------|-----------------------|------------------|------------------|
|                       | Utilitarian       | Social            | Hedonic          | Utilitarian           | Social           | Hedonic          |
| Utilitarian           | -11.42<br>(64.46) | 4.74<br>(14.74)   | 6.68<br>(20.80)  | -7.67<br>(68.21)      | 3.19<br>(13.19)  | 4.48<br>(18.60)  |
| Social                | 5.95<br>(35.17)   | -10.76<br>(36.39) | 4.81<br>(28.44)  | 2.68<br>(31.90)       | -4.85<br>(42.30) | 2.17<br>(25.80)  |
| Hedonic               | 4.46<br>(38.61)   | 1.01<br>(8.73)    | -5.47<br>(52.66) | 5.64<br>(39.79)       | 1.28<br>(9.00)   | -6.92<br>(51.21) |

**Table F10. Change in State Transition Probability: Time of Day (Baseline: *Night*)**

| $t \rightarrow t + 1$ | <i>Morning</i> (%) |                  |                   | <i>Day</i> (%)   |                  |                  | <i>Evening</i> (%) |                  |                  |
|-----------------------|--------------------|------------------|-------------------|------------------|------------------|------------------|--------------------|------------------|------------------|
|                       | Utilitarian        | Social           | Hedonic           | Utilitarian      | Social           | Hedonic          | Utilitarian        | Social           | Hedonic          |
| Utilitarian           | -1.84<br>(70.27)   | 0.76<br>(12.33)  | 1.08<br>(17.40)   | -3.93<br>(68.18) | 1.63<br>(13.20)  | 2.30<br>(18.62)  | -7.52<br>(64.59)   | 3.12<br>(14.69)  | 4.40<br>(20.72)  |
| Social                | 2.91<br>(34.55)    | -5.26<br>(37.49) | 2.35<br>(27.96)   | 1.57<br>(33.21)  | -2.82<br>(39.93) | 1.25<br>(26.86)  | 2.45<br>(34.09)    | -4.42<br>(38.33) | 1.97<br>(27.58)  |
| Hedonic               | 8.53<br>(43.24)    | 1.93<br>(9.78)   | -10.46<br>(46.98) | 1.98<br>(36.69)  | 0.45<br>(8.30)   | -2.43<br>(55.01) | 3.92<br>(38.63)    | 0.89<br>(8.74)   | -4.81<br>(52.63) |

## G. Robustness Check – 25-Minute Threshold for Session Split

**Table G1.** Effects of Previous App Choice on Current Choice (Utilitarian State)

| $t \rightarrow t + 1$ | Social (%)       | Information (%)  | Entertainment (%) | Shopping (%)    | Tool (%)         | Stop  |
|-----------------------|------------------|------------------|-------------------|-----------------|------------------|-------|
| Social                | 10.89<br>(34.88) | -3.91<br>(22.98) | -2.58<br>(6.99)   | -0.90<br>(1.65) | -3.50<br>(33.50) | 53.35 |
| Information           | -6.66<br>(17.33) | 16.99<br>(43.88) | -2.70<br>(6.87)   | -0.79<br>(1.76) | -6.84<br>(30.16) | 51.69 |
| Entertainment         | -1.80<br>(22.19) | -6.25<br>(20.64) | 10.54<br>(20.11)  | -1.00<br>(1.55) | -1.49<br>(35.51) | 60.12 |
| Shopping              | -2.32<br>(21.67) | 0.37<br>(27.26)  | -1.81<br>(7.76)   | 7.56<br>(10.11) | -3.80<br>(33.20) | 61.33 |
| Tool                  | -7.49<br>(16.50) | -6.35<br>(20.54) | -3.07<br>(6.50)   | -1.53<br>(1.02) | 18.44<br>(55.44) | 50.01 |
| Intrinsic Share       | (23.99)          | (26.89)          | (9.57)            | (2.55)          | (37.00)          | ----- |

**Table G2.** Effects of Previous App Choice on Current Choice (Social State)

| $t \rightarrow t + 1$ | Social (%)        | Information (%)  | Entertainment (%) | Shopping (%)     | Tool (%)         | Stop  |
|-----------------------|-------------------|------------------|-------------------|------------------|------------------|-------|
| Social                | 27.46<br>(89.60)  | -2.85<br>(1.29)  | -18.95<br>(7.19)  | -4.17<br>(1.36)  | -1.49<br>(0.56)  | 9.46  |
| Information           | -18.61<br>(43.53) | 29.65<br>(33.79) | -8.09<br>(18.05)  | -2.16<br>(3.37)  | -0.79<br>(1.26)  | 17.11 |
| Entertainment         | -16.22<br>(45.92) | -1.70<br>(2.44)  | 20.99<br>(47.13)  | -2.30<br>(3.23)  | -0.77<br>(1.28)  | 17.38 |
| Shopping              | -3.89<br>(58.25)  | -1.11<br>(3.03)  | -10.40<br>(15.74) | 16.03<br>(21.56) | -0.63<br>(1.42)  | 17.48 |
| Tool                  | -7.37<br>(54.77)  | 0.01<br>(4.15)   | -5.55<br>(20.59)  | -0.73<br>(4.80)  | 13.64<br>(15.69) | 21.23 |
| Intrinsic Share       | (62.14)           | (4.14)           | (26.14)           | (5.53)           | (2.05)           | ----- |

**Table G3.** Effects of Previous App Choice on Current Choice (Hedonic State)

| $t \rightarrow t + 1$ | Social (%)        | Information (%)  | Entertainment (%) | Shopping (%)     | Tool (%)         | Stop  |
|-----------------------|-------------------|------------------|-------------------|------------------|------------------|-------|
| Social                | 35.02<br>(64.72)  | -8.70<br>(6.05)  | -21.21<br>(24.92) | -1.75<br>(1.69)  | -3.36<br>(2.62)  | 12.88 |
| Information           | -8.98<br>(20.72)  | 26.24<br>(40.99) | -15.10<br>(31.03) | -0.92<br>(2.52)  | -1.24<br>(4.74)  | 18.54 |
| Entertainment         | -13.59<br>(16.11) | -10.39<br>(4.36) | 28.69<br>(74.82)  | -1.87<br>(1.57)  | -2.84<br>(3.14)  | 8.68  |
| Shopping              | -10.43<br>(19.27) | -5.58<br>(9.17)  | -18.06<br>(28.07) | 36.60<br>(40.04) | -2.53<br>(3.45)  | 17.43 |
| Tool                  | -9.66<br>(20.04)  | -6.96<br>(7.79)  | -9.36<br>(36.77)  | -0.83<br>(2.61)  | 26.81<br>(32.79) | 15.45 |
| Intrinsic Share       | (29.70)           | (14.75)          | (46.13)           | (3.44)           | (5.98)           | ----- |

**Table G4. Effects of Previous App Usage on Current Duration (Utilitarian State)**

| $t \rightarrow t + 1$ | Social          | Information     | Entertainment   | Shopping        | Tool            |
|-----------------------|-----------------|-----------------|-----------------|-----------------|-----------------|
| Social                | -0.40<br>(2.40) | -1.02<br>(5.13) | 0.11<br>(2.91)  | -0.17<br>(0.92) | -0.60<br>(2.89) |
| Information           | -0.03<br>(2.77) | -0.61<br>(5.54) | -0.47<br>(2.33) | -0.22<br>(0.87) | 0.01<br>(3.50)  |
| Entertainment         | -0.26<br>(2.54) | 1.02<br>(7.17)  | -0.48<br>(2.32) | 0.10<br>(1.19)  | -0.93<br>(2.56) |
| Shopping              | -0.09<br>(2.71) | -1.30<br>(4.85) | 0.44<br>(3.24)  | -0.66<br>(0.43) | 1.73<br>(5.22)  |
| Tool                  | -0.01<br>(2.79) | 0.91<br>(7.06)  | 0.09<br>(2.89)  | -0.16<br>(0.93) | 0.40<br>(3.89)  |
| Intrinsic Time        | (2.80)          | (6.15)          | (2.80)          | (1.09)          | (3.49)          |

**Table G5. Effects of Previous App Usage on Current Duration (Social State)**

| $t \rightarrow t + 1$ | Social          | Information     | Entertainment   | Shopping        | Tool            |
|-----------------------|-----------------|-----------------|-----------------|-----------------|-----------------|
| Social                | -0.28<br>(4.03) | -0.05<br>(1.14) | -0.07<br>(1.66) | 0.03<br>(0.61)  | -0.26<br>(0.84) |
| Information           | 0.04<br>(4.35)  | -0.17<br>(1.02) | -0.12<br>(1.61) | -0.02<br>(0.56) | -0.10<br>(1.00) |
| Entertainment         | -0.10<br>(4.21) | 0.24<br>(1.43)  | -0.49<br>(1.24) | 0.03<br>(0.61)  | -0.14<br>(0.96) |
| Shopping              | -0.18<br>(4.13) | -0.17<br>(1.02) | 0.58<br>(2.31)  | 0.20<br>(0.78)  | 0.37<br>(1.47)  |
| Tool                  | -0.22<br>(4.09) | 0.35<br>(1.54)  | 0.03<br>(1.76)  | -0.04<br>(0.54) | 0.06<br>(1.16)  |
| Intrinsic Time        | (4.31)          | (1.19)          | (1.73)          | (0.58)          | (1.10)          |

**Table G6. Effects of Previous App Usage on Current Duration (Hedonic State)**

| $t \rightarrow t + 1$ | Social          | Information     | Entertainment   | Shopping        | Tool            |
|-----------------------|-----------------|-----------------|-----------------|-----------------|-----------------|
| Social                | -0.24<br>(2.91) | -0.15<br>(1.52) | 0.10<br>(4.61)  | 0.04<br>(2.27)  | 0.14<br>(2.43)  |
| Information           | 0.19<br>(3.34)  | -0.28<br>(1.39) | -0.66<br>(3.85) | -0.50<br>(1.73) | 0.20<br>(2.49)  |
| Entertainment         | -0.27<br>(2.88) | 0.27<br>(1.94)  | -0.07<br>(4.44) | 0.09<br>(2.32)  | -0.05<br>(2.24) |
| Shopping              | 0.23<br>(3.38)  | -0.10<br>(1.57) | 0.31<br>(4.82)  | 0.52<br>(2.75)  | -0.10<br>(2.19) |
| Tool                  | -0.02<br>(3.13) | 0.04<br>(1.71)  | -0.50<br>(4.01) | 0.69<br>(2.92)  | -0.10<br>(2.19) |
| Intrinsic Time        | (3.15)          | (1.67)          | (4.51)          | (2.23)          | (2.29)          |

**Table G7. Intrinsic State Transition Matrix**

| $t \rightarrow t + 1$ | Utilitarian (%) | Social (%) | Hedonic (%) |
|-----------------------|-----------------|------------|-------------|
| Utilitarian           | 66.60           | 11.96      | 21.44       |
| Social                | 31.02           | 42.33      | 26.65       |
| Hedonic               | 34.70           | 8.32       | 56.98       |

**Table G8. Change in State Transition Probability: WiFi (Baseline: 3G)**

| $t \rightarrow t + 1$ | Utilitarian (%)  | Social (%)       | Hedonic (%)     |
|-----------------------|------------------|------------------|-----------------|
| Utilitarian           | -2.46<br>(65.59) | 0.88<br>(12.32)  | 1.58<br>(22.09) |
| Social                | 0.91<br>(31.40)  | -1.69<br>(41.63) | 0.78<br>(26.97) |
| Hedonic               | -2.37<br>(33.72) | -0.57<br>(8.09)  | 2.94<br>(58.19) |

**Table G9. Change in State Transition Probability: Location (Baseline: Office)**

| $t \rightarrow t + 1$ | Home (%)          |                  |                  | On the Way (%)   |                  |                  |
|-----------------------|-------------------|------------------|------------------|------------------|------------------|------------------|
|                       | Utilitarian       | Social           | Hedonic          | Utilitarian      | Social           | Hedonic          |
| Utilitarian           | -10.05<br>(63.42) | 3.60<br>(13.10)  | 6.45<br>(23.48)  | -4.39<br>(69.08) | 1.57<br>(11.07)  | 2.82<br>(19.85)  |
| Social                | 5.21<br>(32.36)   | -9.68<br>(39.85) | 4.47<br>(27.79)  | 2.82<br>(29.97)  | -5.23<br>(44.30) | 2.41<br>(25.73)  |
| Hedonic               | 6.49<br>(36.17)   | 1.56<br>(8.67)   | -8.05<br>(55.16) | 4.21<br>(33.89)  | 1.02<br>(8.13)   | -5.23<br>(57.98) |

**Table G10. Change in State Transition Probability: Time of Day (Baseline: Night)**

| $t \rightarrow t + 1$ | Morning (%)      |                  |                   | Day (%)          |                  |                  | Evening (%)      |                  |                  |
|-----------------------|------------------|------------------|-------------------|------------------|------------------|------------------|------------------|------------------|------------------|
|                       | Utilitarian      | Social           | Hedonic           | Utilitarian      | Social           | Hedonic          | Utilitarian      | Social           | Hedonic          |
| Utilitarian           | -3.24<br>(68.07) | 1.16<br>(11.44)  | 2.08<br>(20.49)   | -3.03<br>(68.28) | 1.08<br>(11.36)  | 1.95<br>(20.36)  | -8.32<br>(62.99) | 2.97<br>(13.25)  | 5.35<br>(23.76)  |
| Social                | 2.17<br>(30.89)  | -4.03<br>(42.58) | 1.86<br>(26.53)   | 3.06<br>(31.78)  | -5.68<br>(40.93) | 2.62<br>(27.29)  | 1.97<br>(30.69)  | -3.65<br>(42.96) | 1.68<br>(26.35)  |
| Hedonic               | 9.38<br>(42.22)  | 2.25<br>(10.13)  | -11.63<br>(47.65) | 0.88<br>(33.72)  | 0.21<br>(8.09)   | -1.09<br>(58.19) | 1.58<br>(34.42)  | 0.38<br>(8.26)   | -1.96<br>(57.32) |

## H. Robustness Check – Reclassify App Category

We examine the robustness of app classification. Specifically, there are three well-known social-shopping apps in the China market during the sample period: MeiLiShuo, MoGuJie and BeiMeiShengQianKuaiBao. In the main model, we classify them as shopping apps. To check the robustness of the findings, we re-classify them as social apps. We then re-estimate the model and perform the same analyses. We report the results below. The main findings are robust.

**Table H1.** Effects of Previous App Choice on Current Choice (Utilitarian State)

| $t \rightarrow t + 1$ | Social (%)       | Information (%)  | Entertainment (%) | Shopping (%)    | Tool (%)         | Stop  |
|-----------------------|------------------|------------------|-------------------|-----------------|------------------|-------|
| Social                | 10.89<br>(35.43) | -2.43<br>(25.18) | -2.12<br>(6.97)   | -0.75<br>(2.30) | -5.59<br>(30.12) | 58.25 |
| Information           | -6.82<br>(17.72) | 18.52<br>(46.13) | -2.51<br>(6.58)   | -1.14<br>(1.91) | -8.05<br>(27.66) | 54.17 |
| Entertainment         | -5.21<br>(19.33) | -4.25<br>(23.36) | 10.88<br>(19.97)  | -1.26<br>(1.79) | -0.16<br>(35.55) | 62.26 |
| Shopping              | -5.04<br>(19.50) | 0.66<br>(28.27)  | -1.43<br>(7.66)   | 9.80<br>(12.85) | -3.99<br>(31.72) | 63.77 |
| Tool                  | -5.87<br>(18.67) | -6.46<br>(21.15) | -3.12<br>(5.97)   | -1.68<br>(1.37) | 17.13<br>(52.84) | 53.85 |
| Intrinsic Share       | (24.54)          | (27.61)          | (9.09)            | (3.05)          | (35.71)          | ----- |

**Table H2.** Effects of Previous App Choice on Current Choice (Social State)

| $t \rightarrow t + 1$ | Social (%)        | Information (%)  | Entertainment (%) | Shopping (%)     | Tool (%)         | Stop  |
|-----------------------|-------------------|------------------|-------------------|------------------|------------------|-------|
| Social                | 27.10<br>(90.74)  | -3.31<br>(1.19)  | -17.43<br>(5.95)  | -4.58<br>(1.50)  | -1.78<br>(0.62)  | 8.67  |
| Information           | -19.38<br>(44.26) | 31.40<br>(35.90) | -8.61<br>(14.77)  | -2.45<br>(3.63)  | -0.96<br>(1.44)  | 17.12 |
| Entertainment         | -15.18<br>(48.46) | -1.07<br>(3.43)  | 18.88<br>(42.26)  | -1.85<br>(4.23)  | -0.78<br>(1.62)  | 19.45 |
| Shopping              | -9.05<br>(54.59)  | -1.48<br>(3.02)  | -9.80<br>(13.58)  | 21.14<br>(27.22) | -0.81<br>(1.59)  | 18.05 |
| Tool                  | -9.00<br>(54.64)  | 0.00<br>(4.50)   | -6.81<br>(16.57)  | -0.81<br>(5.27)  | 16.62<br>(19.02) | 22.17 |
| Intrinsic Share       | (63.64)           | (4.50)           | (23.38)           | (6.08)           | (2.40)           | ----- |

**Table H3.** Effects of Previous App Choice on Current Choice (Hedonic State)

| $t \rightarrow t + 1$ | Social (%)        | Information (%)  | Entertainment (%) | Shopping (%)     | Tool (%)         | Stop  |
|-----------------------|-------------------|------------------|-------------------|------------------|------------------|-------|
| Social                | 36.71<br>(74.97)  | -7.88<br>(4.72)  | -23.32<br>(16.50) | -1.90<br>(1.69)  | -3.61<br>(2.12)  | 12.44 |
| Information           | -11.32<br>(26.94) | 24.66<br>(37.26) | -11.25<br>(28.57) | -0.82<br>(2.77)  | -1.27<br>(4.46)  | 20.75 |
| Entertainment         | -14.72<br>(23.54) | -8.26<br>(4.34)  | 27.74<br>(67.56)  | -1.81<br>(1.78)  | -2.95<br>(2.78)  | 10.07 |
| Shopping              | -14.92<br>(23.34) | -5.34<br>(7.26)  | -15.50<br>(24.32) | 37.75<br>(41.34) | -1.99<br>(3.74)  | 18.98 |
| Tool                  | -8.42<br>(29.84)  | -5.08<br>(7.52)  | -9.48<br>(30.34)  | -0.75<br>(2.84)  | 23.73<br>(29.46) | 17.40 |
| Intrinsic Share       | (38.26)           | (12.60)          | (39.82)           | (3.59)           | (5.73)           | ----- |

**Table H4.** Effects of Previous App Usage on Current Duration (Utilitarian State)

| $t \rightarrow t + 1$ | Social          | Information     | Entertainment   | Shopping        | Tool            |
|-----------------------|-----------------|-----------------|-----------------|-----------------|-----------------|
| Social                | -0.39<br>(2.13) | -0.62<br>(3.93) | -0.11<br>(2.81) | -0.22<br>(0.75) | -0.42<br>(3.42) |
| Information           | -0.10<br>(2.42) | -0.68<br>(3.87) | -0.32<br>(2.60) | -0.21<br>(0.76) | -0.10<br>(3.74) |
| Entertainment         | -0.15<br>(2.37) | 0.45<br>(5.00)  | -0.72<br>(2.20) | 0.01<br>(0.98)  | -0.83<br>(3.01) |
| Shopping              | 0.05<br>(2.57)  | -0.64<br>(3.91) | 0.96<br>(3.88)  | -0.57<br>(0.40) | 1.26<br>(5.10)  |
| Tool                  | -0.11<br>(2.41) | 0.34<br>(4.89)  | -0.11<br>(2.81) | -0.14<br>(0.83) | 0.02<br>(3.86)  |
| Intrinsic Time        | (2.52)          | (4.55)          | (2.92)          | (0.97)          | (3.84)          |

**Table H5.** Effects of Previous App Usage on Current Duration (Social State)

| $t \rightarrow t + 1$ | Social          | Information     | Entertainment   | Shopping        | Tool            |
|-----------------------|-----------------|-----------------|-----------------|-----------------|-----------------|
| Social                | -0.47<br>(2.99) | -0.07<br>(1.09) | -0.10<br>(1.39) | 0.00<br>(0.56)  | -0.21<br>(0.82) |
| Information           | -0.06<br>(3.40) | -0.13<br>(1.03) | -0.07<br>(1.42) | -0.03<br>(0.53) | -0.13<br>(0.90) |
| Entertainment         | -0.14<br>(3.32) | -0.00<br>(1.16) | -0.37<br>(1.12) | 0.00<br>(0.56)  | -0.13<br>(0.90) |
| Shopping              | 0.27<br>(3.73)  | -0.17<br>(0.99) | 0.38<br>(1.87)  | 0.08<br>(0.64)  | 0.18<br>(1.21)  |
| Tool                  | -0.09<br>(3.37) | 0.11<br>(1.27)  | 0.02<br>(1.51)  | 0.04<br>(0.60)  | 0.02<br>(1.05)  |
| Intrinsic Time        | (3.46)          | (1.16)          | (1.49)          | (0.56)          | (1.03)          |

**Table H6.** Effects of Previous App Usage on Current Duration (Hedonic State)

| $t \rightarrow t + 1$ | Social          | Information     | Entertainment   | Shopping        | Tool            |
|-----------------------|-----------------|-----------------|-----------------|-----------------|-----------------|
| Social                | -0.27<br>(2.86) | -0.35<br>(1.22) | 0.08<br>(3.87)  | -0.09<br>(2.21) | -0.07<br>(1.84) |
| Information           | -0.09<br>(3.04) | -0.13<br>(1.44) | -0.40<br>(3.39) | -0.46<br>(1.84) | 0.01<br>(1.92)  |
| Entertainment         | -0.12<br>(3.01) | 0.14<br>(1.71)  | -0.21<br>(3.58) | 0.14<br>(2.44)  | -0.14<br>(1.77) |
| Shopping              | -0.07<br>(3.06) | -0.32<br>(1.25) | 0.33<br>(4.12)  | 0.10<br>(2.40)  | 0.04<br>(1.95)  |
| Tool                  | -0.18<br>(2.95) | -0.06<br>(1.51) | -0.11<br>(3.68) | 1.02<br>(3.32)  | -0.14<br>(1.77) |
| Intrinsic Time        | (3.13)          | (1.57)          | (3.79)          | (2.30)          | (1.91)          |

**Table H7. Intrinsic State Transition Matrix**

| $t \rightarrow t + 1$ | Utilitarian (%) | Social (%) | Hedonic (%) |
|-----------------------|-----------------|------------|-------------|
| Utilitarian           | 67.24           | 11.56      | 21.20       |
| Social                | 30.60           | 45.79      | 23.61       |
| Hedonic               | 35.58           | 7.51       | 56.91       |

**Table H8. Change in State Transition Probability: WiFi (Baseline: 3G)**

| $t \rightarrow t + 1$ | Utilitarian (%)  | Social (%)      | Hedonic (%)      |
|-----------------------|------------------|-----------------|------------------|
| Utilitarian           | -1.53<br>(66.62) | 0.53<br>(11.58) | 1.00<br>(21.80)  |
| Social                | -0.15<br>(30.54) | 0.27<br>(45.90) | -0.12<br>(23.56) |
| Hedonic               | -0.86<br>(35.22) | -0.18<br>(7.44) | 1.04<br>(57.34)  |

**Table H9. Change in State Transition Probability: Location (Baseline: Office)**

| $t \rightarrow t + 1$ | Home (%)          |                  |                  | On the Way (%)   |                  |                  |
|-----------------------|-------------------|------------------|------------------|------------------|------------------|------------------|
|                       | Utilitarian       | Social           | Hedonic          | Utilitarian      | Social           | Hedonic          |
| Utilitarian           | -11.02<br>(64.25) | 3.82<br>(12.40)  | 7.20<br>(23.35)  | -6.39<br>(68.88) | 2.21<br>(10.79)  | 4.18<br>(20.33)  |
| Social                | 4.61<br>(32.04)   | -8.17<br>(43.24) | 3.56<br>(24.72)  | 1.28<br>(28.71)  | -2.27<br>(49.14) | 0.99<br>(22.15)  |
| Hedonic               | 5.56<br>(36.88)   | 1.17<br>(7.79)   | -6.73<br>(55.33) | 3.58<br>(34.90)  | 0.75<br>(7.37)   | -4.33<br>(57.73) |

**Table H10. Change in State Transition Probability: Time of Day (Baseline: Night)**

| $t \rightarrow t + 1$ | Morning (%)      |                  |                  | Day (%)          |                  |                  | Evening (%)      |                  |                  |
|-----------------------|------------------|------------------|------------------|------------------|------------------|------------------|------------------|------------------|------------------|
|                       | Utilitarian      | Social           | Hedonic          | Utilitarian      | Social           | Hedonic          | Utilitarian      | Social           | Hedonic          |
| Utilitarian           | -2.43<br>(69.06) | 0.84<br>(10.73)  | 1.59<br>(20.21)  | -3.49<br>(68.00) | 1.21<br>(11.10)  | 2.28<br>(20.90)  | -6.71<br>(64.78) | 2.32<br>(12.21)  | 4.39<br>(23.01)  |
| Social                | 2.14<br>(30.72)  | -3.79<br>(45.58) | 1.65<br>(23.70)  | 2.31<br>(30.89)  | -4.11<br>(45.26) | 1.80<br>(23.85)  | 2.12<br>(30.70)  | -3.77<br>(45.60) | 1.65<br>(23.70)  |
| Hedonic               | 7.46<br>(40.38)  | 1.58<br>(8.53)   | -9.04<br>(51.09) | 2.87<br>(35.79)  | 0.61<br>(7.56)   | -3.48<br>(56.65) | 1.81<br>(34.73)  | 0.38<br>(7.33)   | -2.19<br>(57.94) |
